# Supplementary material for: Multi-dimensional leaf phenotypes reflect root system genotype in grafted grapevine over the growing season
Source: PubMed Central journal article supplement (PMC8716362; doi:10.1093/gigascience/giab087), 2021-12-29
Supplement: giab087_giga-d-21-00137_original_submission.pdf [file giab087_giga-d-21-00137_original_submission.pdf]

# GigaScience

## Multi-dimensional leaf phenotypes reflect root system genotype in grafted grapevine over the growing season --Manuscript Draft--

|                                                      |                                                                                                                                                                                                                                                                                                                                                                                                                                                                                                                                                                                                                                                                                                                                                                                                                                                                                                                                                                                                                                                                                                                                                                                                                                                                                                                                                                                                                                                                                                                                                                                                                                                                                                                                                                                                                                            |                      |
|------------------------------------------------------|--------------------------------------------------------------------------------------------------------------------------------------------------------------------------------------------------------------------------------------------------------------------------------------------------------------------------------------------------------------------------------------------------------------------------------------------------------------------------------------------------------------------------------------------------------------------------------------------------------------------------------------------------------------------------------------------------------------------------------------------------------------------------------------------------------------------------------------------------------------------------------------------------------------------------------------------------------------------------------------------------------------------------------------------------------------------------------------------------------------------------------------------------------------------------------------------------------------------------------------------------------------------------------------------------------------------------------------------------------------------------------------------------------------------------------------------------------------------------------------------------------------------------------------------------------------------------------------------------------------------------------------------------------------------------------------------------------------------------------------------------------------------------------------------------------------------------------------------|----------------------|
| <b>Manuscript Number:</b>                            | GIGA-D-21-00137                                                                                                                                                                                                                                                                                                                                                                                                                                                                                                                                                                                                                                                                                                                                                                                                                                                                                                                                                                                                                                                                                                                                                                                                                                                                                                                                                                                                                                                                                                                                                                                                                                                                                                                                                                                                                            |                      |
| <b>Full Title:</b>                                   | Multi-dimensional leaf phenotypes reflect root system genotype in grafted grapevine over the growing season                                                                                                                                                                                                                                                                                                                                                                                                                                                                                                                                                                                                                                                                                                                                                                                                                                                                                                                                                                                                                                                                                                                                                                                                                                                                                                                                                                                                                                                                                                                                                                                                                                                                                                                                |                      |
| <b>Article Type:</b>                                 | Research                                                                                                                                                                                                                                                                                                                                                                                                                                                                                                                                                                                                                                                                                                                                                                                                                                                                                                                                                                                                                                                                                                                                                                                                                                                                                                                                                                                                                                                                                                                                                                                                                                                                                                                                                                                                                                   |                      |
| <b>Funding Information:</b>                          | National Science Foundation (1546869)                                                                                                                                                                                                                                                                                                                                                                                                                                                                                                                                                                                                                                                                                                                                                                                                                                                                                                                                                                                                                                                                                                                                                                                                                                                                                                                                                                                                                                                                                                                                                                                                                                                                                                                                                                                                      | Dr Allison J. Miller |
| <b>Abstract:</b>                                     | <p>Modern biological approaches generate volumes of multi-dimensional data, offering unprecedented opportunities to address fundamental biological questions previously beyond reach due to small or subtle effects. A fundamental question in plant biology is the extent to which below-ground activity in the root system influences above-ground traits (phenotypes) expressed in the shoot system. Grafting, an ancient agricultural practice that fuses the root system of one individual (the rootstock) with the shoot system of a second, genetically distinct individual (the scion), is a powerful experimental system to understand below-ground effects on above-ground phenotypes. Previous studies on grafted grapevines have detected rootstock influence on scion phenotypes including physiology and berry chemistry; however, the extent of the rootstock's influence on leaves, the photosynthetic engines of the vine, and how those effects changes over the course of a growing season, are still largely unknown. Here, we investigate associations between rootstock genotype and shoot system phenotypes using five multi-dimensional leaf phenotyping modalities measured in a common grafted scion: ionomics, metabolomics, transcriptomics, morphometrics, and physiology. Rootstock influence is ubiquitous but subtle across modalities with the strongest signature of rootstock observed in the leaf ionome. Moreover, we find that the extent of rootstock influence on scion phenotypes and patterns of phenotypic covariation are highly dynamic across the season. These findings substantially expand previously identified patterns to suggest that rootstock influence on scion phenotypes is complex and broad understanding necessitates volumes of multi-dimensional data previously unmet.</p> |                      |
| <b>Corresponding Author:</b>                         | Zachary N Harris<br>Saint Louis University<br>SAINT LOUIS, MO UNITED STATES                                                                                                                                                                                                                                                                                                                                                                                                                                                                                                                                                                                                                                                                                                                                                                                                                                                                                                                                                                                                                                                                                                                                                                                                                                                                                                                                                                                                                                                                                                                                                                                                                                                                                                                                                                |                      |
| <b>Corresponding Author Secondary Information:</b>   |                                                                                                                                                                                                                                                                                                                                                                                                                                                                                                                                                                                                                                                                                                                                                                                                                                                                                                                                                                                                                                                                                                                                                                                                                                                                                                                                                                                                                                                                                                                                                                                                                                                                                                                                                                                                                                            |                      |
| <b>Corresponding Author's Institution:</b>           | Saint Louis University                                                                                                                                                                                                                                                                                                                                                                                                                                                                                                                                                                                                                                                                                                                                                                                                                                                                                                                                                                                                                                                                                                                                                                                                                                                                                                                                                                                                                                                                                                                                                                                                                                                                                                                                                                                                                     |                      |
| <b>Corresponding Author's Secondary Institution:</b> |                                                                                                                                                                                                                                                                                                                                                                                                                                                                                                                                                                                                                                                                                                                                                                                                                                                                                                                                                                                                                                                                                                                                                                                                                                                                                                                                                                                                                                                                                                                                                                                                                                                                                                                                                                                                                                            |                      |
| <b>First Author:</b>                                 | Zachary N Harris                                                                                                                                                                                                                                                                                                                                                                                                                                                                                                                                                                                                                                                                                                                                                                                                                                                                                                                                                                                                                                                                                                                                                                                                                                                                                                                                                                                                                                                                                                                                                                                                                                                                                                                                                                                                                           |                      |
| <b>First Author Secondary Information:</b>           |                                                                                                                                                                                                                                                                                                                                                                                                                                                                                                                                                                                                                                                                                                                                                                                                                                                                                                                                                                                                                                                                                                                                                                                                                                                                                                                                                                                                                                                                                                                                                                                                                                                                                                                                                                                                                                            |                      |
| <b>Order of Authors:</b>                             | Zachary N Harris                                                                                                                                                                                                                                                                                                                                                                                                                                                                                                                                                                                                                                                                                                                                                                                                                                                                                                                                                                                                                                                                                                                                                                                                                                                                                                                                                                                                                                                                                                                                                                                                                                                                                                                                                                                                                           |                      |
|                                                      | Mani Awale                                                                                                                                                                                                                                                                                                                                                                                                                                                                                                                                                                                                                                                                                                                                                                                                                                                                                                                                                                                                                                                                                                                                                                                                                                                                                                                                                                                                                                                                                                                                                                                                                                                                                                                                                                                                                                 |                      |
|                                                      | Niyati Bhakta                                                                                                                                                                                                                                                                                                                                                                                                                                                                                                                                                                                                                                                                                                                                                                                                                                                                                                                                                                                                                                                                                                                                                                                                                                                                                                                                                                                                                                                                                                                                                                                                                                                                                                                                                                                                                              |                      |
|                                                      | Daniel H. Chitwood                                                                                                                                                                                                                                                                                                                                                                                                                                                                                                                                                                                                                                                                                                                                                                                                                                                                                                                                                                                                                                                                                                                                                                                                                                                                                                                                                                                                                                                                                                                                                                                                                                                                                                                                                                                                                         |                      |
|                                                      | Anne Fennell                                                                                                                                                                                                                                                                                                                                                                                                                                                                                                                                                                                                                                                                                                                                                                                                                                                                                                                                                                                                                                                                                                                                                                                                                                                                                                                                                                                                                                                                                                                                                                                                                                                                                                                                                                                                                               |                      |
|                                                      | Emma Frawley                                                                                                                                                                                                                                                                                                                                                                                                                                                                                                                                                                                                                                                                                                                                                                                                                                                                                                                                                                                                                                                                                                                                                                                                                                                                                                                                                                                                                                                                                                                                                                                                                                                                                                                                                                                                                               |                      |
|                                                      | Laura L. Klein                                                                                                                                                                                                                                                                                                                                                                                                                                                                                                                                                                                                                                                                                                                                                                                                                                                                                                                                                                                                                                                                                                                                                                                                                                                                                                                                                                                                                                                                                                                                                                                                                                                                                                                                                                                                                             |                      |
|                                                      | Laszlo G. Kovacs                                                                                                                                                                                                                                                                                                                                                                                                                                                                                                                                                                                                                                                                                                                                                                                                                                                                                                                                                                                                                                                                                                                                                                                                                                                                                                                                                                                                                                                                                                                                                                                                                                                                                                                                                                                                                           |                      |
|                                                      |                                                                                                                                                                                                                                                                                                                                                                                                                                                                                                                                                                                                                                                                                                                                                                                                                                                                                                                                                                                                                                                                                                                                                                                                                                                                                                                                                                                                                                                                                                                                                                                                                                                                                                                                                                                                                                            |                      |

|                                                                                                                                                                                                                                                                                                                                                                                                                                                                                                                                     |                   |
|-------------------------------------------------------------------------------------------------------------------------------------------------------------------------------------------------------------------------------------------------------------------------------------------------------------------------------------------------------------------------------------------------------------------------------------------------------------------------------------------------------------------------------------|-------------------|
|                                                                                                                                                                                                                                                                                                                                                                                                                                                                                                                                     | Misha Kwasniewski |
|                                                                                                                                                                                                                                                                                                                                                                                                                                                                                                                                     | Jason P. Londo    |
|                                                                                                                                                                                                                                                                                                                                                                                                                                                                                                                                     | Qin Ma            |
|                                                                                                                                                                                                                                                                                                                                                                                                                                                                                                                                     | Zoë Migicovsky    |
|                                                                                                                                                                                                                                                                                                                                                                                                                                                                                                                                     | Joel F. Swift     |
|                                                                                                                                                                                                                                                                                                                                                                                                                                                                                                                                     | Allison J. Miller |
| <b>Order of Authors Secondary Information:</b>                                                                                                                                                                                                                                                                                                                                                                                                                                                                                      |                   |
| <b>Additional Information:</b>                                                                                                                                                                                                                                                                                                                                                                                                                                                                                                      |                   |
| <b>Question</b>                                                                                                                                                                                                                                                                                                                                                                                                                                                                                                                     | <b>Response</b>   |
| Are you submitting this manuscript to a special series or article collection?                                                                                                                                                                                                                                                                                                                                                                                                                                                       | No                |
| <p><b>Experimental design and statistics</b></p> <p>Full details of the experimental design and statistical methods used should be given in the Methods section, as detailed in our <a href="#">Minimum Standards Reporting Checklist</a>. Information essential to interpreting the data presented should be made available in the figure legends.</p> <p>Have you included all the information requested in your manuscript?</p>                                                                                                  | Yes               |
| <p><b>Resources</b></p> <p>A description of all resources used, including antibodies, cell lines, animals and software tools, with enough information to allow them to be uniquely identified, should be included in the Methods section. Authors are strongly encouraged to cite <a href="#">Research Resource Identifiers</a> (RRIDs) for antibodies, model organisms and tools, where possible.</p> <p>Have you included the information requested as detailed in our <a href="#">Minimum Standards Reporting Checklist</a>?</p> | Yes               |
| <p><b>Availability of data and materials</b></p> <p>All datasets and code on which the</p>                                                                                                                                                                                                                                                                                                                                                                                                                                          | Yes               |

conclusions of the paper rely must be either included in your submission or deposited in [publicly available repositories](#) (where available and ethically appropriate), referencing such data using a unique identifier in the references and in the “Availability of Data and Materials” section of your manuscript.

Have you have met the above requirement as detailed in our [Minimum Standards Reporting Checklist](#)?

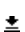

1 **Multi-dimensional leaf phenotypes reflect root system genotype in grafted**  
2 **grapevine over the growing season**

3

4 Zachary N. Harris<sup>1,2\*</sup> (zachary.n.harris@slu.edu), Mani Awale<sup>3</sup> (maybd@mail.missouri.edu), Niyati  
5 Bhakta<sup>1,2</sup> (niyatisbhakta@gmail.com), Daniel H. Chitwood<sup>4,5</sup> (chitwoo9@msu.edu), Anne Fennell<sup>6</sup>  
6 (anne.fennell@sdstate.edu), Emma Frawley<sup>1,2</sup> (emma.frawley@wustl.edu), Laura L. Klein<sup>1,2</sup>  
7 (laura@leafworks.com), Laszlo G. Kovacs<sup>7</sup> (laszlokovacs@missouristate.edu), Misha Kwasniewski<sup>3</sup>  
8 (mtk5407@psu.edu), Jason P. Londo<sup>8</sup> (jason.londo@usda.gov), Qin Ma<sup>9</sup> (qin.ma@osumc.edu), Zoë  
9 Migicovsky<sup>10</sup> (zoe.migicovsky@dal.ca), Joel F. Swift<sup>1,2</sup> (joel.swift@slu.edu), and Allison J. Miller<sup>1,2\*</sup>  
10 (allison.j.miller@slu.edu)

11

12 <sup>1</sup>Department of Biology, Saint Louis University, 3507 Laclede Avenue, St. Louis, MO, 63103-2010, USA

13 <sup>2</sup>Donald Danforth Plant Science Center, 975 North Warson Road, St. Louis, MO, 63132-2918, USA

14 <sup>3</sup>Division of Plant Sciences, University of Missouri, 135 Eckles Hall, Columbia, MO, 65211, USA

15 <sup>4</sup>Department of Horticulture, Michigan State University, East Lansing, MI, 48824, USA

16 <sup>5</sup>Department of Computational Mathematics, Science and Engineering, Michigan State University, East  
17 Lansing, MI, 48824, USA

18 <sup>6</sup>Department of Agronomy, Horticulture & Plant Science, South Dakota State University, Brookings, SD,  
19 57006, USA

20 <sup>7</sup>Department of Biology, Missouri State University, 901S. National Avenue, Springfield, MO, 65897,  
21 USA

22 <sup>8</sup>United States Department of Agriculture, Agricultural Research Service: Grape Genetics Research Unit,  
23 630 West North Street, Geneva, NY, 14456-1371, USA

24 <sup>9</sup>Department of Biomedical Informatics, The Ohio State University, 1585 Neil Ave, Columbus, OH,  
25 43210

26 <sup>10</sup>Department of Plant, Food, and Environmental Sciences, Faculty of Agriculture, Dalhousie University,  
27 Truro, NS, B2N 5E3, Canada

28 \* To whom correspondence should be addressed

29

30

31

32

33

34

35



36 **Abstract**

37 Modern biological approaches generate volumes of multi-dimensional data, offering unprecedented  
38 opportunities to address fundamental biological questions previously beyond reach due to small or subtle  
39 effects. A fundamental question in plant biology is the extent to which below-ground activity in the root  
40 system influences above-ground traits (phenotypes) expressed in the shoot system. Grafting, an ancient  
41 agricultural practice that fuses the root system of one individual (the rootstock) with the shoot system of a  
42 second, genetically distinct individual (the scion), is a powerful experimental system to understand  
43 below-ground effects on above-ground phenotypes. Previous studies on grafted grapevines have detected  
44 rootstock influence on scion phenotypes including physiology and berry chemistry; however, the extent of  
45 the rootstock's influence on leaves, the photosynthetic engines of the vine, and how those effects changes  
46 over the course of a growing season, are still largely unknown. Here, we investigate associations between  
47 rootstock genotype and shoot system phenotypes using five multi-dimensional leaf phenotyping  
48 modalities measured in a common grafted scion: ionomics, metabolomics, transcriptomics,  
49 morphometrics, and physiology. Rootstock influence is ubiquitous but subtle across modalities with the  
50 strongest signature of rootstock observed in the leaf ionome. Moreover, we find that the extent of  
51 rootstock influence on scion phenotypes and patterns of phenotypic covariation are highly dynamic across  
52 the season. These findings substantially expand previously identified patterns to suggest that rootstock  
53 influence on scion phenotypes is complex and broad understanding necessitates volumes of multi-  
54 dimensional data previously unmet.

55

56 **Background**

57

58 High-throughput data acquisition has afforded unprecedented capacity to quantify and understand  
59 plant form and function. Recent advances in imaging and computation have expanded our ability to  
60 measure plant structures [1,2], and to extend those comprehensive measurements into latent space  
61 phenotypes [3]. Now broadly known as phenomics, this burgeoning field is characterized as the

62 acquisition and analysis of high-dimensional phenotypic data at hierarchical levels [4,5], often with an  
63 eye toward multiscale data integration. A holistic and hierarchical approach to plant phenotypic variation  
64 affords unique insights into plant evolution, and how plants change over development and in response to  
65 environmental cues and horticultural manipulation.

66 A fundamental question in plant biology is how root systems influence phenotypic variation in  
67 above-ground shoot systems including leaves, flowers, and fruits. Grafting, a common horticultural  
68 manipulation that joins the shoot system of one individual (the scion) with the root system of another  
69 individual (the rootstock), is commonly used in crop species to confer favorable phenotypes to  
70 commercial scions [6], including enhanced disease resistance [7,8], fruit quality, plant form [9], response  
71 to water stress [10], and growth on particular soils [11,12]. Because grafting often uses clonally  
72 propagated materials, it is possible to manipulate and replicate different combinations of root systems and  
73 shoot systems, offering a valuable experimental system in which root system impacts on shoot system  
74 phenotypes can be evaluated.

75 The European grapevine (*Vitis vinifera*) is among the most economically important grafted crops  
76 in the world. Grapevines are cultivated primarily for fruits used to make wine and juice, as well as for  
77 table grape and raisin production. Grafting in grapevines became widespread in the mid-1800's following  
78 the accidental introduction of the root-feeding aphid phylloxera from its native North America into  
79 Europe, where it began attacking the roots of European grapevines [13]. Because European grapevines  
80 often did not survive phylloxera infestation, most grapevine cultivation now consists of European  
81 grapevines grafted to rootstocks derived from phylloxera-resistant North American *Vitis* species including  
82 *V. berlandieri*, *V. riparia*, and *V. rupestris*, and their hybrid derivatives. In addition to grapevines, more  
83 than 70 major perennial crops are grafted including many fruit trees and vines [9]. In these crops, grafting  
84 decouples the breeding of shoot systems and root systems, with selection in plants targeted for use as  
85 scions focusing primarily on fruit traits, and selection in plants targeted for use as rootstocks focused on  
86 below-ground biotic and abiotic stress resistance, as well as their impacts on shoot system phenotypes.

87           The effects of grafting in grapevine show a remarkable breadth of scion response patterns. For  
88 example, a study of *Vitis vinifera* ‘Cabernet Sauvignon’ grafted to different rootstocks identified  
89 transcriptome reprogramming in the scion of grafted plants; this appeared to be a general effect of  
90 grafting to a rootstock and was not rootstock-specific [14]. In contrast, other studies have found  
91 signatures of rootstock genotype in the transcriptome in early berry development, although this distinction  
92 was lost in later development [15,16], but see [17]. Comprehensive phenomic analyses, including those  
93 that link transcriptome data with other high-throughput phenotypic assays, offer an opportunity to expand  
94 understanding of rootstock effects on grapevine shoots. In one study, leaves of the *V. vinifera* cultivar  
95 ‘Gaglioppo’ showed variation in stilbene and abscisic acid concentrations due to rootstock genotype, as  
96 well as differences in transcriptional profiles [18]. Likewise, gene expression, ion concentrations, and leaf  
97 shape in the cultivar ‘Chambourcin’ varied in response to rootstock genotype [18,19]. Collectively, these  
98 studies suggest the impacts of grafting are diverse and may vary over the course of vine development.  
99 However, to date few studies have surveyed multiple high-dimensional scion phenotypes to understand  
100 the rootstock influence on shoot system traits over the course of the growing season or the extent to which  
101 grafting effects on the scion covary with one another.

102           Grapevine leaves are the photosynthetic engine of the organism and a primary site for perception  
103 and response to environmental change. Leaves present a wide variety of highly variable and readily  
104 assayable phenotypes, providing an important opportunity for phenomic assessment. Grapevine leaves  
105 have been used for centuries as markers of species and cultivar delimitation, developmental variation,  
106 disease presence, and nutrient deficiency [20,21]. More recently, analysis of grapevine leaf morphology  
107 has identified genetic architecture of leaf shapes [22], developmental patterns across the season [23], and  
108 signatures of evolution in the grapevine genus [24]. Grapevine leaves respond to stress through gas and  
109 water exchange with the atmosphere [25,26] and have been shown to differentially partition the ionome  
110 depending on their position on the shoot [19] and their rootstock genotype [19,27,28]. The volume of  
111 work on grapevine leaves provides a foundation for the analysis of phenomic variation in a vineyard over  
112 a season in response to grafting.

113 In this study, we investigate effects of grafting on high dimensional leaf phenotypes of the hybrid  
114 cultivar ‘Chambourcin’ over the course of the growing season. We quantify leaf elemental (ion)  
115 concentrations, metabolite abundance, gene expression, shape, and vine physiology in a replicated  
116 rootstock trial where the hybrid grapevine cultivar ‘Chambourcin’ is growing ungrafted and grafted to  
117 three different rootstocks. The four root-shoot combinations (‘Chambourcin’ ungrafted, ‘Chambourcin’  
118 grafted to three different rootstocks) are replicated 72 times in a randomized block experimental design  
119 with an irrigation treatment (Supplemental Figure 1). Data were collected either on the full 288-vine set  
120 (ion concentrations, leaf shape) or on a subset of 72 vines (the 72-vine set; metabolite abundance, gene  
121 expression, vine physiology). Using data collected at three time points that span the growing season  
122 (anthesis, veraison, and harvest), we show that ionic, metabolomic, transcriptomic, morphometric, and  
123 physiology phenotypes reflect subtle but ubiquitous responses to grafting and rootstock genotype.  
124 Rootstock effects were often dynamic across the season, suggesting that accounting for seasonal variation  
125 could alter our understanding of grafting in viticulture.

126

## 127 **Data Description**

128

### 129 *Leaf Ionomics*

130 The ionome describes elemental composition of a tissue at a particular time point [29]. Three  
131 leaves per vine were collected from the 288-vine set. Leaves were sampled from a single shoot and  
132 included the youngest fully opened leaf at the shoot tip, the approximate middle leaf, and the oldest leaf at  
133 the shoot base. Whole leaves were placed in zip-lock bags in the field and stored in a cooler on ice packs,  
134 scanned for leaf shape analysis in the lab (see Leaf Shape) and then dried in coin envelopes at 50°C for  
135 one to three days for elemental analysis. Between 20 and 100 mg of leaf tissue was acid digested and 20  
136 ions were quantified using inductively coupled plasma mass spectrometry (ICP-MS) following standard  
137 protocol [30,31] at the Donald Danforth Plant Science Center (DDPSC). Ion quantifications were  
138 corrected for internal standard concentrations, instrument drift and by initial sample mass as part of the

139 DDPSC Ionomics Pipeline. For each ion concentration, we computed z-score distributions and used those  
140 values as the basis for linear models. Non-standardized values were used for machine learning analysis.

141

#### 142 *Leaf Metabolomics*

143 The metabolome comprises small molecules present in a tissue, representing a catalogue of the  
144 products of metabolic processes [32,33]. Metabolomic analysis was completed at veraison and harvest for  
145 the 72-vine set. For each vine, three mature leaves were sampled from the middle of a single shoot and  
146 immediately flash frozen in liquid nitrogen to capture the metabolic state of the leaves when attached to  
147 the vine. Leaves were sampled near midday in row and block order. Frozen leaves were transported to the  
148 University of Missouri Enology lab on dry ice and stored at -80°C. Following the protocol of [34], whole  
149 leaves were manually ground in liquid nitrogen with a mortar and pestle, 0.5g of powder was weighed  
150 into a centrifuge tube, 1.5ml of 1:1 MeOH: ACN was added. Samples were vortexed to suspend leaf  
151 particles and sonicated for 20 minutes in an ice bath. Following extraction, samples were centrifuged for  
152 10 minutes at 3,000 g and filtered with a 0.22 PTFE syringe filter into a 1.5ml sample vial before  
153 injecting into a Waters XEVO™ QToF LCMS system (Waters Corporation, Milford, MA, USA).  
154 Chromatographic separation was achieved using a Waters Acquity™ Ultra Performance LC H-Class  
155 system (Waters Corporation, Milford, MA, USA) equipped with Waters Acquity BEH C18 column  
156 (2.1mmx150mm and 1.7µm particle size) and a diode array detector. Samples were injected in random  
157 order across the sampling periods. The injection volume was set at 2.5µl and the flow rate was set at 0.4  
158 ml/min. The mobile phase consisted of 0.1% formic acid in water (solvent A) and 0.1% formic acid and  
159 5% water in acetaldehyde (solvent B) and the gradient was as follows: 100% A for 0.5 min; 0.5-18min  
160 increased to 99% B; 18-19 min. held at 99% B; mobile phase was re-equilibrated for 2 min between runs.  
161 Diode array was monitored at 225-500nm. Mass spectrometry was performed on a Xevo™ QToF  
162 (Waters Corporation, Milford, MA, USA). The electrospray ionization (ESI) was operated in both  
163 positive or negative ionization modes in separate runs. The scan range was set as m/z 50-1500 with 0.2

164 sec accumulation time. MS settings were as follows: capillary voltage was 2.5kV; cone voltage ramped  
165 from 20-40V; collision energy was set to 6V; detector voltage was set to 1950V; desolvation gas was set  
166 to 1000 L/hour; cone gas was set to 50 L/hr; source temperature was 120 °C and desolvation temperature  
167 was set at 550 °C.

168 LC-MS instrument files were converted to .cdf format and uploaded to XCMS online [35] for  
169 chromatogram normalization and feature detection via “single job” parameters. Identified metabolomic  
170 features were used as the basis of a principal components (PC) analysis. The top 20 PCs were treated as  
171 distinct phenotypes to model according to the experimental design. In PCs that varied significantly by  
172 rootstock, features that loaded more than 1.96 standard deviations above or below the mean were fit  
173 independently with the same model design.

#### 174 *Leaf Gene Expression*

175 The youngest fully-opened leaves on two shoots were collected from each plant of the 72-vine set  
176 (see Study Design). The two leaves, which were distinct from leaves used for ionomics, leaf shape,  
177 metabolomics and physiology data collection, were pooled for RNA sequencing. Samples were sequenced  
178 using 3'-RNAseq, a method ideal for organisms with reasonably characterized reference genomes [36].  
179 The first 12 nucleotides from each read were trimmed to remove low-quality sequences using  
180 Trimmomatic (options: HEADCROP:12; [37]). Low quality trimmed reads were additionally identified  
181 based on overrepresentation of kmers and removed using BBduk (April 2019 release) [38]. Trimmed and  
182 QC-controlled reads were mapped to the 12Xv2 reference *Vitis vinifera* genome [39,40] using STAR  
183 (v2.7.2b) [41] with default alignment parameters. RNAseq read alignments were quantified using HTSeq-  
184 count (v0.11.2) [42] and a modified version of the VCost.v3 reference *V. vinifera* genome annotation  
185 [40]. To capture mis-annotated gene body boundaries in the genome, all gene boundaries in the  
186 annotation were extended 500 bp.

187 Variation in gene expression was assessed using two methodologies. First, we identified  
188 individual genes which responded to specific factors in the experimental design using DESeq2 (v1.24.0)

189 [43]. Each gene was fit with the model “~ Block + Irrigation + Phenology\_Rootstock” where the  
190 ‘Phenology\_Rootstock’ model term was used to understand the potential interaction of phenology and  
191 rootstock. Differentially expressed genes were identified for each pairwise contrast in the model. Genes  
192 were filtered to a gene set that included only genes with a normalized count greater than or equal to two in  
193 at least five samples. Second, we used principal component analysis (PCA) to collapse variation in co-  
194 expressed genes into fewer dimensions. Normalized count-filtered genes from DESeq2 were transformed  
195 using the variance stabilizing transformation (VST; [44]) and input into a PCA. We then analyzed the top  
196 100 PCs in the context of the broader experimental design. We previously showed that the transcriptome  
197 varied by the time of collection and was potentially interacting with the rootstock effect [19]. Moreover,  
198 the other modalities in this study point to weak if any effects from the irrigation treatment. Due to the  
199 nature of the vineyard design, we could not identify both irrigation and time effects (marked by row) in a  
200 single model (irrigation and row are collinear; see Study Design). To approximate the impact from time  
201 of collection (row) in the vineyard on gene expression, linear models were first fit to remove variation  
202 imparted by irrigation from each of the top 100 PCs. The residuals were then used as the basis for linear  
203 models and machine learning analysis.

204

### 205 *Leaf Shape*

206 All leaves from a single shoot directly emerging from a trained cordon were collected from each  
207 vine in the 288 vine set at 80% anthesis and veraison. At harvest, we collected only the oldest (first  
208 emerging leaf), middle (estimated from the middle of a whole shoot), and youngest (smallest fully  
209 emerged leaf at the shoot tip, >1cm). Leaves were collected approximately in row order (from south to  
210 north) and stored in a cooler. Each leaf was imaged using an Epson DS-50000 scanner. Following  
211 scanning of leaves for leaf shape analysis, the oldest, middle, and youngest leaves were dried and used to  
212 estimate leaf elemental composition (see Ionomics). While all leaves were collected from a single shoot,  
213 only the oldest, middle, and youngest were used in this analysis.

214 We assessed leaf shape using generalized procrustes analysis (GPA) of landmarks. For the three  
215 leaves per vine used in leaf shape analysis, 17 homologous landmark features were identified [22]. The  
216 GPA-rotated coordinate space was used for all subsequent statistical analysis including PCA in order to  
217 summarize variation in leaf shape [45]. From the PCA, we extracted the top 20 PCs and fit linear models  
218 and machine learning models to describe variation.

219

#### 220 *Vine physiology*

221 Intracellular CO<sub>2</sub> concentration, stomatal conductance and leaf transpiration rate were measured  
222 at midday (10am to 1pm) on one fully expanded sun-exposed leaf for each of the vines in the 72-vine set.  
223 Measurements were taken using an LI-6400XT Portable Photosynthesis system coupled with a pulse  
224 amplitude-modulated (PAM) leaf chamber fluorometer (Li-Cor, Inc., Lincoln, NE, USA) with the  
225 following parameters: incident photosynthetic photo flux density level of 1000 μmol m<sup>-2</sup> s<sup>-1</sup> generated  
226 by a red LED array and 10% blue light to maximize stomatal opening, CO<sub>2</sub> mixer of 400 μmol/s, fixed  
227 flow of 300 μmol/s, and ambient leaf and block temperature. Soil moisture was measured for each plant in  
228 the 72-vine set using a fieldScout TDR 300 Moisture meter equipped with 20 cm rods (Spectrum  
229 Technologies, Inc. Aurora, IL, USA). Midday stem water potential was measured using a pressure  
230 bomb/chamber (PMS Instrument Co., Albany, OR, USA) after enclosing the leaves in an aluminum foil  
231 bag for at least 15 minutes to equilibrate the water potential of the xylem in the stem to that attached leaf.

232

#### 233 **Analyses**

234

#### 235 *Leaf ionome*

236 To characterize the leaf ionome over the growing season, we sampled the youngest, middle, and  
237 oldest leaf from a single shoot from each of the vines within the 288-vine set at three phenological stages  
238 (Figure 1). Bivariate correlations showed that ion concentrations are not independent of each other, but  
239 the strength and direction of relationships between ions vary with respect to phenological stage and leaf



240 position (Supplemental Figure 2). As such, we fit independent linear models to each ion. Leaf position,  
241 phenological stage, or the interaction of phenological stage and leaf position explained the highest amount  
242 of variation for most ions (Figure 1A-B). Many ions significant for the interaction showed a clear signal  
243 of leaf position at anthesis and veraison, and either no explainable variation or muted variation at harvest.  
244 For example, calcium (Figure 1B) varied with leaf position (22.7%;  $p < 1e-05$ ), phenology (24.0%;  $p <$   
245  $1e-05$ ), and their interaction (7.4%,  $p < 1e-05$ ). All possible pairwise combinations of leaf position were  
246 significantly different at anthesis, and both the youngest and middle leaves were different from the oldest  
247 leaves at veraison and harvest. In the case of potassium (Figure 1B), significant variation was explained  
248 by leaf position (16.1%;  $p < 1e-05$ ), phenology (19.6%;  $p < 1e-05$ ), and their interaction (10.6%;  $p < 1e-$   
249  $05$ ). However, post-hoc comparisons showed that differences were present only at anthesis and veraison.

250         The rootstock showed remarkable influence on the composition of the leaf ionome. All ions  
251 except aluminum, sodium, and zinc were significant for rootstock as a single fixed effect (Figure 1A).  
252 Rootstock explained between 0.4% (rubidium;  $p = 3.2e-05$ ) and 14.3% (nickel;  $p < 1e-05$ ) of variation in  
253 each ion (Figure 1A). Ions that responded weakly to the interaction of leaf position and phenology tended  
254 to show significant variation explained by the interaction of rootstock and phenology. These ions showed  
255 similar patterns to the leaf position by phenology interaction where clear signal was exhibited at anthesis  
256 and veraison then is either absent or muted at harvest. For example, cobalt was most abundant in ‘1103P’-  
257 grafted vines at anthesis (Figure 1C). At veraison, both ‘1103P’-grafted and ‘SO4’-grafted had elevated  
258 concentrations compared to Ungrafted and ‘3309’-grafted vines. However, by harvest, cobalt  
259 concentration variation was muted and only ‘SO4’-grafted vines showed evidence of elevated  
260 concentration. Similarly, nickel showed significant variation partitioned into the rootstock by phenology  
261 effect (Figure 1C). Both anthesis and veraison show reduced nickel concentration in ‘1103P’-grafted  
262 vines and elevated concentrations in ‘SO4’-grafted vines. However, at harvest, no comparisons are  
263 significant.

264         Machine learning on ion concentrations confirms that the leaf ionome contains a signature from  
265 the rootstock genotype and the interactions of rootstock genotype with phenology and leaf position. A

266 random forest model trained to predict rootstock showed an overall accuracy of 75.2% (Figure 1D). Ions  
267 important for this classification were nickel (MDA=0.089), molybdenum (MDA=0.058), and magnesium  
268 (MDA=0.054), corroborating the rootstock term's significance in the linear models. Notably, when we  
269 trained a model to simultaneously predict rootstock and phenological stage, rootstock prediction accuracy  
270 increased appreciably (Figure 1E). For example, the ability of the model to detect ungrafted vines (the  
271 balanced accuracy of ungrafted predictions) improved from 81.7% accuracy overall to 91.1% accuracy at  
272 anthesis and 85.9% at harvest. Generally, performance at veraison matched the rootstock-only model  
273 performance. The ions most important for this joint (rootstock/phenological stage) prediction were nickel  
274 (MDA=0.167), phosphorus (MDA=0.110), and strontium (MDA=0.065). The rootstock by phenology  
275 model term was significant in the linear models for these ions, but was not a largest descriptor of  
276 variation. The joint prediction of rootstock and leaf position performed substantially better than chance ( $p$   
277  $< 1e-05$ ), but accounting for leaf position did not improve rootstock prediction as was the case in the joint  
278 prediction of rootstock and phenology (Figure 1F). Ions important for this classification were sulfur  
279 (MDA = 0.051), rubidium (MDA = 0.051), and nickel (MDA = 0.049).

280

### 281 *Leaf metabolomics*

282 We performed untargeted metabolomics on leaves from the 72-vine set at veraison and harvest,  
283 quantifying the concentrations of 661 metabolites (Figure 2). The top 20 PCs accounted for a total of  
284 67.3% of the total metabolomic variation, with the top three capturing 23.1%, 9.2%, and 6.2%,  
285 respectively. Individual PCs after the top 20 explained less than 0.82% of the metabolome. Linear models  
286 for each of the top 20 PCs found that the strongest drivers of variation in leaf metabolomics were  
287 phenology and temporal blocking factor. For example, 90.6% of variation on PC1 was due to phenology  
288 ( $p < 1e-05$ ; Figure 2A). PC2 primarily reflected the interaction of phenology and temporal block (26.4%,  
289  $p < 1e-05$ ) and temporal block as a main effect (18.9%,  $p < 1e-05$ ). The patterns of variation attributable  
290 to PC2 were similar in PCs 3-10 (Figure 2A).

291 PC17 was controlled by rootstock as a main effect (18.5%,  $p < 1e-03$ ; Figure 2B). On PC17,  
292 ungrafted vines were significantly different from vines grafted to ‘3309C’ ( $p = 0.02$ ) and ‘SO4’ ( $p < 1e-$   
293 05). Vines grafted to ‘1103P’ were also significantly different from vines grafted to ‘SO4’ ( $p = 0.009$ ).  
294 Metabolites that loaded more than 1.96 sd from the mean loading on PC17 were extracted and  
295 independently fit to additional linear models. We identified four metabolite features (M374T1 [rt = 1.33,  
296 m/z = 374.1146], M117T1 [rt = 0.61, m/z = 117.0583], M175T1\_1 [rt = 0.87, m/z = 175.1269], and  
297 M333T1\_3 [rt = 0.71; m/z = 333.1582]) which were influenced by rootstock as a main effect and the  
298 metabolite (M112T1 [rt = 1.48, m/z = 112.0061]) which was influenced by the interaction of rootstock  
299 genotype and phenological stage. At this time, the identification of these features remains unknown.

300 Linear discriminant analysis confirmed that many experimental factors likely influence the  
301 metabolome. For example, when trained to maximize variation between classes of rootstocks, the model  
302 identified a space that weakly separates ‘1103P’-grafted and ‘SO4’-grafted vines from Ungrafted and  
303 ‘3309C’-grafted vines (LD1) and separates ‘3309C’-grafted vines from other classes (on LD2) (Figure  
304 2C). Despite this, machine learning showed minimal predictability for any class other than phenology,  
305 which was predictable with an accuracy of 100% for withheld samples. Rootstock genotype based on the  
306 metabolome was not predictable with accuracy only marginally better than chance (34.6%).

307

### 308 *Gene Expression*

309 We performed 3’-RNAseq on the 72 vine set at three time points (Figure 3). We identified  
310 variation in 23,460 genes that had a DESeq2-normalized count greater than two in at least five samples.  
311 Using a traditional analysis framework, all genes returned as significantly differentially expressed by  
312 rootstock appeared to be false positives, evidenced by a single extreme outlier altering group means.  
313 Hierarchical clustering of the 500 most variable genes after variance stabilizing transformation (VST)  
314 showed strong latent structure in the transcriptome and that most variation in the transcriptome was  
315 explained by phenological stage (Figure 3A). The top 100 PCs on the VST-transformed gene counts  
316 accounted for nearly 92.3% of variation in the transcriptome. Linear models on each of the top 100 PCs

317 indicated that 82.4% and 61.4% of the variation on PC1 and PC2 respectively were attributable to the  
318 phenological stage (Figure 3B-C). Row was also a significant descriptor of variation as a single, fixed  
319 effect and in interactions with rootstock and phenological stage. For example, row accounted for 36.0%  
320 and 43.3% of the variation on PC4 and PC6, respectively. Interacting with phenological stage, row  
321 accounted for >10% of variation on 17 additional PCs.

322         Patterns of gene expression identified through LDA corresponded to phenological stage, vine  
323 row, and rootstock. LDA separated phenological stages into three distinct, non-overlapping groups in the  
324 space spanning LD1 and LD2 (Supplemental Figure 3). When trying to separate rows into distinct classes,  
325 the model converged on a ‘horseshoe’ shape in the LD1- LD2 space (Figure 3D). LD1 maximized the  
326 variation between row 8 (sampled early in the day) and row 16 (sampled a few hours later). LD2  
327 maximized the separation of both rows 8 and 16 with row 12 (the row sampled in the middle of the  
328 sampling window). A model trained to separate rootstock classes (Figure 3E) showed that LD1 separated  
329 the rootstock 1103P from other rootstock genotypes, and LD2 primarily separated the rootstock ‘3309C’  
330 from ungrafted vines (Supplemental Figure 3).

331         Formal machine learning on gene expression PCs largely supported the linear models. A random  
332 forest trained to predict phenological stage classified testing samples with 92.9% accuracy. Anthesis was  
333 the most predictable class with a balanced accuracy of 100%; veraison and harvest displayed balanced  
334 accuracies of 92.7% and 92.4%, respectively. The PCs most important in phenology prediction were PC1  
335 (MDA = 0.16) and PC2 (MDA = 0.12). Gene expression PCs were unable to predict rootstock, with a  
336 total prediction accuracy of 23.4%. While no features were especially important in the prediction  
337 processes, PC44 showed the largest mean decrease in Gini impurity corroborating its signal in the linear  
338 models.

339

#### 340 *Leaf shape*

341         We collected leaves from the 288-vine set at three time points and landmarked a total of 2,422  
342 leaves (Figure 4). Homologous leaf landmarks were used for generalized procrustes analysis (GPA). PCA

343 on the GPA-rotated coordinates revealed ~97.2% of the total shape variation was captured by the top 20  
344 principal components with PC1, PC2, and PC3 explaining 24.1%, 19.0%, and 13.3% of the variation  
345 respectively. Lower values on PC1 primarily capture leaves with shallow petiolar sinuses and short  
346 midvein distance from the depth of the superior sinus to the top of the midvein, whereas higher values on  
347 PC1 capture the opposite (Figure 4A). Similarly, lower values on PC2 capture deep petiolar sinuses  
348 combined with very shallow superior sinuses, and vice versa for higher values. PC3 primarily captures  
349 asymmetry (Figure 4A).

350 In total, only 5.76% of variation on PC1 was explained by the experimental design, with most  
351 variation explained by phenology (2.63%;  $p_{adj} < 1e-05$ ), rootstock (0.95%;  $p_{adj} < 0.001$ ), leaf position  
352 (2.61%;  $p_{adj} = 0.03$ ), and the interaction of phenology and leaf position (0.62%;  $p_{adj} = 0.009$ )  
353 (Supplemental Figure 4A). Post-hoc mean comparisons on PC1 showed that shapes of leaves from  
354 ungrafted vines were significantly different from leaves of vines grafted to 1103P ( $p < 0.001$ ), 3309C ( $p <$   
355  $0.001$ ) and SO4 ( $p < 0.001$ ) (Supplemental Figure 4B). Moreover, PC1 captured subtle variation in the  
356 leaf position by phenological stage interaction where middle leaves showed significant differences  
357 between anthesis and veraison ( $p < 1e-03$ ), and the oldest leaves showed significant differences when  
358 comparing anthesis to veraison ( $p < 1e-05$ ) and anthesis to harvest ( $p < 1e-03$ ).

359 For PC2, 61.4% of variation could be assigned to an experimental factor. This included  
360 significant variation from leaf position (46.9%,  $p_{adj} < 1e-05$ ), phenology (1.4%;  $p_{adj} < 1e-05$ ), and the  
361 interaction of leaf position and phenology (12.05%;  $p_{adj} < 1e-05$ ; Figure 4D). Specifically, younger  
362 leaves tended to have shallower sinuses and exaggerated superior sinus depths (higher values on PC2),  
363 whereas older leaves tended to develop deeper petiolar sinuses and more shallow superior sinuses (lower  
364 values on PC2). The degree of this separation decreased across the season, and the shapes converged on  
365 the mean leaf shape on PC2, consistent with the middle leaf at all three phenological stages. PC2  
366 additionally reflected the interaction of leaf position and rootstock (0.22%;  $p = 0.04$ ; Supplemental Figure  
367 4B), but post-hoc comparisons did not find any significant pairwise comparisons.

368 Machine learning on the GPA-rotated coordinate space identified moderate division of  
369 developmental and phenological classes. Random forest models could predict the leaf position with  
370 73.1% accuracy, with the most important feature being the y-component of the leaf apex (MDA = 0.051).  
371 A model trained to predict phenology performed at 64.3% with the most important features being the x-  
372 components of the points corresponding to superior sinus depth (left sinus MDA = 0.030, right sinus  
373 MDA = 0.019). A model trained to predict rootstock performed only marginally better than chance at  
374 28.1% accuracy.

375

### 376 *Vine physiology*

377 For the 72-vine set, we measured intracellular CO<sub>2</sub> concentration (C<sub>i</sub>), stomatal conductance (g<sub>s</sub>),  
378 leaf transpiration, water potential ( $\psi$ ), and soil moisture (Figure 5). Each physiological trait varied  
379 significantly across phenology and the block by phenology interaction (Figure 5A). For example, at  
380 harvest, we observed specific differences in leaf CO<sub>2</sub> concentration (A vs C: p=0.003; B vs C: p=0.002)  
381 and leaf transpiration (A vs B: p < 1e-03; A vs C: p < 1e-05; B vs C: p < 1e-05). Leaf transpiration and  
382 stomatal conductance varied significantly with the interaction of rootstock and phenology. A post-hoc  
383 comparison of means showed that leaf transpiration and stomatal conductances were elevated in  
384 ‘Chambourcin’ vines grafted to ‘1103P’ at veraison as compared to leaves of ungrafted vines (leaf  
385 transpiration: p = 0.001; stomatal conductance: p = 0.002 Figure 5B-C).

386

387

### 388 *Phenomic trait covariation*

389 Four leaf data modalities consisted of at least 10 traits and were measured for all plants in the 72-  
390 vine set (leaf ionome, leaf metabolomics, gene expression, leaf shape). Using these data, we explored the  
391 extent to which different phenotypes covaried over phenology and rootstock genotype (Figure 6;  
392 Supplemental Figure 5; Supplemental Figure 6). Within each phenotyping modality, we summarized the  
393 primary dimensions of variation using PCA (see Methods). From each PCA, we extracted the top 10 PCs,

394 which explained a total of 88.9% of variation in the ionomics PCA (iPCA), 55.9% of the variation for the  
395 metabolomics PCA (mPCA), 74.8% of the variation in the gene expression PCA (gPCA) and 87.9% of  
396 the variation in the leaf shape PCA (sPCA).

397         Pairwise correlations of each PC within each phenological stage showed diverse correlation  
398 magnitudes and directions both within a phenotyping modality and between phenotyping modalities  
399 (Figure 6A-C; Supplemental Figure 5). Generally, the strongest relationships were between PCs within  
400 phenotypic modalities. For example, the strongest correlations identified were between gPC1 and gPC2 at  
401 anthesis ( $r = 0.85$ , CI = [0.81, 0.87]; Supplemental Figure 5A, and mPC1 and mPC2 at harvest ( $r = -0.78$ ,  
402 CI = [-0.82, -0.76]). Correlations between modalities represented a diversity of responses across  
403 phenological stages. For example, the correlation between gPC4 and sPC3 is similar across the  
404 phenological stages, but only the correlation at veraison is significant ( $r = 0.41$ , CI = [0.34, 0.47];  
405 Supplemental Figure 5B). Correlations such as between mPC3 and gPC6 were similar and significant at  
406 both veraison ( $r = -0.44$ , CI = [-0.50, -0.37]; Supplemental Figure 5C) and harvest ( $r = -0.37$ , CI = [-0.45,  
407 -0.28]; Supplemental Figure 5C). While many correlations varied over the course of the season, some  
408 relationships entirely shifted in direction. For example, the correlation between mPC3 and mPC6 shifted  
409 from a positive significant relationship ( $r = 0.58$ , CI = [0.52, 0.63]) at veraison to a negative significant  
410 relationship at harvest ( $r = -0.66$ , CI = [-0.73, -0.59]) (Supplemental Figure 5D).

411         Pairwise comparisons of PCs within each rootstock genotype show a suite of traits with  
412 significant presence/absence variation in significant correlations. Where each phenological stage showed  
413 modularity by phenotyping modality, variation over rootstock genotype shows a strong ionomics module  
414 with latent combination of other modalities interspersed (Supplemental Figure 6). For example, in  
415 ungrafted vines, mPC1 was correlated with four PCs from the ionome (Supplemental Figure 6A). Each of  
416 the other rootstock genotypes have dramatically different topologies with the ionome tending to be more  
417 connected within the ionome and connected to other modalities only on the periphery (Supplemental  
418 Figure 6B-D). Examples of presence/absence variation are shown in small modules of two latent  
419 phenotypes that are present in only one rootstock genotype. For example, in the ungrafted vines, the

420 correlation between gPC4 and mPC3 was significant ( $r = -0.58$ ,  $CI = [-0.65, -0.51]$ ) and, in ‘1103P’-  
421 grafted vines, the correlation between mPC3 and sPC6 ( $r = 0.59$ ,  $CI = [0.53, 0.70]$ ) was significant.

422

## 423 **Discussion**

424

425 In this study, we used grafted grapevines as an experimental system for characterizing root system  
426 impacts on high dimensional leaf phenotypes over the course of a growing season. We detected  
427 ubiquitous but subtle effects of the root system on all assayed phenotypes, and demonstrated that rootstock  
428 influences on leaf phenotypes can be season-specific. The strongest signals of rootstock influences on  
429 leaves were observed in the ionomics dataset, phenotypes for which the root systems have a noted and  
430 well-understood role.

431

### 432 *Phenology explains significant variation in all leaf phenotypes*

433 The timing of sampling or phenological stage of the vines (anthesis, veraison, harvest) was the  
434 strongest driver of phenotypic variation for most leaf phenotypes. For example, all 20 ions varied with  
435 phenology and most ions showed that phenology, or the interaction of phenology with leaf developmental  
436 position, was the strongest source of variation (Figure 1). Nearly one third of all measured transcripts  
437 responded to seasonal variation, and the strongest effects on the transcriptome were phenology and row, a  
438 correlate for the time within a three-hour sampling window. The only phenotype for which phenology  
439 was not the most explanatory factor is leaf shape. Consistent with previous studies [23], we confirm that  
440 most of the leaf shape variation measured reflects development along a single shoot, but much of this  
441 variation is explained via interaction with phenology. These data highlight the dynamic nature of  
442 biological processes taking place within grapevines over the course of a season.

443 The seasonal component to grapevine phenotypic variation is a subject of much research,  
444 especially in the berry. In studies designed to quantify molecular underpinnings of terroir, seasonal  
445 variation was identified as the strongest signal in the metabolome [46–49]. Several studies have



446 characterized transcriptomic variation over the course of the season. For example, in conjunction with  
447 metabolomics, seasonal variation of berry development was used to identify transcriptomic and  
448 metabolomic developmental markers in ‘Corvina’ [50]. Follow-up analysis showed that nearly 18% of  
449 transcripts varied seasonally [51]. Grapevine leaves also vary tremendously in shape over the growing  
450 season [23] and are stable over multiple growing seasons; interestingly, grapevine leaves are patterned in  
451 the previous year, and the climate of the season in which the leaves were patterned influence aspects of  
452 leaf shape [52,53].

453

#### 454 *Grafting and rootstock genotype exhibit a complex and subtle signal on leaf phenotypes*

455 Consistent with previous studies, we confirm that grafting, as well as rootstock genotype, has a  
456 complex effect on phenotypic variation in the scion (the grafted shoot system). Most notably, we show  
457 that the rootstock to which a scion is grafted influences ion concentrations in leaves. Rootstock genotype  
458 is predictable from ion concentrations in the leaves; further, this signal is strengthened when phenological  
459 stage is included in the model. For example, we previously showed that nickel concentration was elevated  
460 in vines grafted to the rootstock ‘SO4’ [19]. At a similar point in the season, we observe the same pattern,  
461 but by harvest, nickel was almost entirely excluded from the leaf. This suggests that the biological  
462 implications of this differential uptake could be missed if not surveyed across the season. We also  
463 confirm that rootstock genotype influences the metabolome of grafted grapevine, in some cases in a  
464 season-specific manner. In the transcriptome, PCA was able to identify dimensions of variation that were  
465 significantly described by rootstock and the interaction of rootstock and time of day, confirming prior  
466 observations [19]. Patterns of gene expression were associated with rootstock in some analyses; for  
467 example, supervised methodologies identified linear discriminants in the PC space that separated some  
468 rootstock genotypes. However, gene-by-gene analysis found no genes modulated by rootstock genotype,  
469 or even just from the act of grafting that were not driven entirely by a single outlier. We suspect these  
470 results are due, at least in part, to the strength of the phenology effect overpowering more subtle variation  
471 imparted by rootstock genotype. Finally, of the physiology traits we measured, leaf transpiration and

472 stomatal conductance were higher vines grafted to ‘1103P’ in the middle of the season. Thus, the impact  
473 of grafting on leaf phenotypic variation varies by phenotype. Regardless, we identify subtle but  
474 ubiquitous effects from rootstock genotype on shoot system phenotype.

475         Understanding of rootstock genotype influence shoot system phenotypes is a growing area of  
476 research, especially in grapevine. For example, in ‘Cabernet Sauvignon’, grafting increased ion uptake  
477 globally and some rootstock genotypes provide a clear signal in the scion [28,54]. Also, the metabolome  
478 is a key driver of the formation of the graft junction and some key metabolites could be responsible for  
479 graft incompatibility [55]. Building on this work, targeted metabolomics showed two classes of  
480 metabolites, flavanols and stilbenes, were differentially abundant at graft junctions and in the rootstocks  
481 of ‘Cabernet Sauvignon’ vines one month after grafting [56]. However, flavanols were not differentially  
482 abundant in the scion, but scion stilbene concentrations were apparently controlled by rootstock genotype.  
483 The effect of rootstock genotype on the scion transcriptome is perhaps the most varied. For example,  
484 ‘Cabernet Sauvignon’ shoot apical meristems show no effects by rootstock genotype [14], but berries of  
485 the same cultivar do, although the effect is tempered by seasonal variation [15]. Variation in  
486 ‘Chambourcin’ leaf shape is also driven by rootstock genotype, especially in conjunction with differences  
487 in irrigation [19]. Collectively, these studies all suggest that rootstock genotype influences scion  
488 phenotypes, but those effects will vary by phenotype, scion genotype, and perhaps other experimental  
489 conditions. Data presented here confirm and expand upon previous observations of rootstock effects on  
490 scion phenotypes. Notably, the robust experimental design (288 vine set and 72 vine set comprising  
491 replicates of three rootstocks grafted with a common scion and an ungrafted control), coordinated  
492 collection of five multi-dimensional leaf phenotypes, and inclusion of three sampling points spanning the  
493 growing season allow us to hone in on the comprehensive nature of rootstock influences on the scion.  
494 Further, this thorough analysis demonstrates that rootstock effects on scion phenotypes shift in magnitude  
495 over the course of the season, indicating that aspects of time are tremendously influential to the observed  
496 results regardless of phenotype.

497

498 *Phenomic covariation warrants work toward latent phenotypes*

499           In the present study, we assess the extent of covariation among leaf phenotypes. For the primary  
500 dimensions of variation in each data type, within-data-type correlations are strongest when accounting for  
501 phenological timing. Correlations also exist between phenotypes, suggesting room for the analysis of  
502 latent phenotypic structure for experimental questions. For example, aspects of the metabolome were  
503 frequently correlated with the transcriptome and leaf shape when accounting for both phenological stage  
504 and rootstock genotype. Interestingly, correlations within and between data types are highly dynamic over  
505 a growing season and across rootstock genotype. For example, several correlations with leaf shape were  
506 present at veraison, but were not detected at anthesis and harvest. Moreover, the topology of connections  
507 in the ionomic network was variable over the rootstock genotype (Supplemental Figure 6). This variation  
508 in topology confirms that root system genotype has a strong influence on shoot system elemental  
509 composition, and suggests that root system genotype can alter correlative patterns in the ionome. We  
510 believe the work of understanding phenomic covariation warrants further investigation, specifically, by  
511 further including additional phenotypes such as lncRNA expression [57,58], epigenetics [59], and  
512 microbiomes [60,61]. Much of the work constituting phenomics in grapevine has addressed how berries  
513 develop over the growing season, how cultivars differ from one another, and how the concept of terroir  
514 influences wine [46,47,50,62–64]. Despite data integration techniques becoming more popular, there are  
515 still many open questions as to what analytical methods are most appropriate and how to most effectively  
516 utilize them (reviewed for grapevine in [65,66]; reviewed broadly in [67,68]). Ongoing work attempts to  
517 integrate high-dimensional phenotypic datasets generated within a single organ system (e.g., leaves); and  
518 future studies will expand this to explore phenomic covariation in and among organs, over time, and  
519 across space.

520

## 521 **Potential Implications**

522           Our work on the influence of root system genotype on shoot system phenotype has broad  
523 implications for a holistic understanding of how plants detect and respond to changing environmental

524 conditions. In particular, this study highlights the influence of root system genotype and its interaction  
525 with phenology on shoot system phenotype: there is a seasonal component to the extent to which  
526 rootstock shapes phenotypic variation in the scion. Expanding this multi-dimensional understanding of  
527 phenotypic variation over time to include different tissues (e.g., root architecture, floral and fruit  
528 development), and different spatial scales (replicated root-shoot combinations located in geographically  
529 distinct vineyards) presents a challenging but exciting next frontier. Of particular note, patterns of  
530 phenomic covariation derived from complex datasets have implications for understanding how  
531 individuals perceive and respond to their environments, and how that response is coordinated throughout  
532 the plant body. This work is relevant for breeding efforts aimed at optimizing yield and other desired  
533 traits that can be optimized, or constrained by, phenotypic variation elsewhere in the plant.

534

## 535 **Methods**

536

### 537 *Study Design*

538 Data were collected in 2017 in an experimental rootstock trial at the University of Missouri's  
539 Southwest Research Center near Mount Vernon, MO (37.074167 N; 93.879167 W; Supplemental Figure  
540 1). The rootstock trial includes the interspecific hybrid cultivar 'Chambourcin' growing ungrafted (own-  
541 rooted) and grafted to three rootstocks: '1103P', '3309C', and 'SO4' (Supplemental Figure 1D). Each of  
542 the four rootstock-scion combinations was replicated 72 times for a total of 288 vines planted in nine  
543 rows. Each row was treated with one of three irrigation treatments: full evapotranspiration replacement,  
544 partial (50%) evapotranspiration replacement (reduced deficit irrigation; RDI), or no evapotranspiration  
545 replacement (Supplemental Figure 1A). However, rainfall in 2017 likely mitigated the applied irrigation  
546 treatment (see Supplemental Note at:

547 [https://github.com/PGRP1546869/mt\\_vernon\\_2017\\_leaf/blob/main/On\\_the\\_irrigation\\_treatment.pdf](https://github.com/PGRP1546869/mt_vernon_2017_leaf/blob/main/On_the_irrigation_treatment.pdf)).

548 Vine position in the vineyard corresponded to time of sampling for some phenotypes, as samples were  
549 taken from one end of the vineyard to the other over the course of two to three hours. Because vineyard

550 microclimates and sampling time may be associated with phenotypic variation, we defined ‘temporal  
551 block’ as a factor that captures this spatial and temporal variation inherent in sampling. Unique rootstock-  
552 scion combinations were planted in cells of four adjacent replicated vines (Supplemental Figure 1B), with  
553 rows consisting of eight cells (32 vines/row). To our knowledge, a field-planted rootstock experimental  
554 vineyard of this size and age is rare. For some phenotypes (leaves for ionome and leaf shape analysis), it  
555 was possible to collect samples from all vines in the experimental vineyard (the 288-vine set;  
556 Supplemental Figure 1C). For other phenotypes (physiology, metabolomics, and gene expression), time  
557 and/or expense associated with the phenotyping process required that we reduce sampling to a nested set  
558 of 72 vines representing the middle two vines in each four-vine cell (the 72-vine set; Supplemental Figure  
559 1C). All phenotypes were assayed \at three phenological stages: anthesis (~80% of open flowers; 22 May  
560 2017); veraison (~50% of berries had transitioned from green to red; 30 July 2017); and immediately  
561 prior to harvest (25 September 2017).

562

### 563 *Linear Models*

564 Linear models were fit to the 20 measured ion concentrations, the top 20 PCs of the leaf  
565 metabolome, the top 100 PCs of the leaf transcriptome, the top 20 PCs of leaf morphospace, and each  
566 measured physiological trait. Outliers were detected using the R function ‘anomalize’ (options:  
567 alpha=0.03, max\_anoms=0.1). Each model was fit with fixed effect factors representing phenological  
568 stage (anthesis, veraison, or harvest), rootstock (Ungrafted, ‘1103P’, ‘3309C’, or ‘SO4’), leaf position  
569 (youngest, middle, or oldest; only used in leaf morphology and leaf ion concentration models), and all  
570 pairwise interactions of those terms. Both irrigation and block were included as fixed, non-interacting  
571 effects with the exceptions of physiology and metabolomics, for which we allowed the interaction of  
572 ‘Block’ as it correlates with the time of sampling, potentially capturing temporal variation. Row, an  
573 additional correlate for time and spatial variation, was included in place of a temporal block for the gene  
574 expression models after removal of the variation attributable to irrigation, a factor collinear with row. All  
575 linear models were interpreted using a type-3 sum of squares computation using the R package ‘car’ [69].

576 Estimated p-values for each term in the models were corrected for multiple tests (within phenotype) using  
577 FDR correction as implemented by the R package ‘stats’ [70]. Results from the models are reported as the  
578 variation explained by a particular term in the model and the estimated p-value. When appropriate, post-  
579 hoc mean comparisons were computed using the package ‘emmeans’ [71]. Where multiple linear models  
580 were being simultaneously interpreted, we applied a Bonferonni correction to reduce the number of false  
581 positives.

582

### 583 *Machine Learning to Identify Rootstock Effects*

584 For visualization of between-class variation, we fit linear discriminant analysis models (LDA) to  
585 the full phenotypic data sets of ionomics, metabolomics, gene expression, and leaf morphology using the  
586 ‘lda’ function of the R package ‘MASS’ [72]. Projections of all samples into the LD space were plotted  
587 using ggplot2 [73]. In addition, we employed machine learning to capture subtle experimental effects. We  
588 partitioned phenotypic data sets into 80% training partitions and 20% testing partitions. Models were fit  
589 to predict the phenological stage from which a sample was taken, the rootstock to which the scion was  
590 grafted, and the joint prediction of phenology and rootstock. We also tested the predictability of leaf  
591 position for ionomics and leaf shape, and the interaction of rootstock and leaf position for ionomics. We  
592 used the ‘randomForest’ [74] implementation of the random forest algorithm. Models were fit and tuned  
593 using the R package ‘caret’ [75]. Each performance was assessed using accuracy, with performance on  
594 each class being assessed using the balanced accuracy, the midpoint of class-wise sensitivity and  
595 specificity. Where appropriate, models were compared to ‘chance’, or the occurrence frequency of each  
596 class. Confusion matrices were visualized from the out-of-bag predictions using ggplot2. Important  
597 features were identified from the randomForest object based on a phenotype-specific mean decrease in  
598 model accuracy (MDA).

599

600 *Phenomic trait covariation*

601 We extracted ionomics, metabolomics, gene expression, and leaf shape data for the youngest  
602 available leaf from the 72 vine-set. Each class of phenotypic data was summarized along the primary  
603 dimensions of variation using PCA. For each class, we extracted the top 10 PCs and fit Pearson's  
604 correlations across all pairs of PCs at each phenological stage. P-values from computed correlations were  
605 corrected using the FDR method from the package 'stats' [76]. Correlations and their strengths were  
606 visualized using the R package 'igraph' [77]. Example correlations were reported after running 10,000  
607 bootstrapped subsamples of 90% of data for paired traits. From the distribution of estimated correlation  
608 coefficients, confidence intervals were computed from the 0.025 and 0.975 quantiles. A subset of example  
609 correlations were plotted using the R package 'ggplot2' [73].

610

611 **Acknowledgments:**

612 This work was funded by the National Science Foundation Plant Genome Research Project 1546869. We  
613 thank members of the Miller Lab at Saint Louis University and the Donald Danforth Plant Science  
614 Center, members of the Kovacs Lab at Missouri State University, members of the Kwasniewski Lab at the  
615 University of Missouri, and members Londo Lab at the USDA-ARS Grape Research Unit for vineyard  
616 sampling and sample processing. We express special thanks to Matthew Rubin and Elizabeth Kellogg at  
617 the Donald Danforth Plant Science Center for valuable comments on the manuscript.

618

619 **Figure Legends:**

620 Figure 1: The ionome shows strong signal from rootstock genotype, leaf position, and phenological stage  
621 **(A)** Percent variation captured in linear models fit to each of 20 ions measured in the ionomics pipeline.  
622 Presence of a cell indicates the model term (top) was significant (FDR;  $p_{adj} < 0.05$ ) for that ion (left).  
623 **(B)** Example ions shown to vary significantly by the interaction of leaf position and phenological stage.  
624 Boxes are bound by 25th and 75th percentile with whiskers extending 1.5 IQR from the box. **(C)** Example  
625 ions shown to vary significantly by the interaction of rootstock genotype and phenological state. Boxes

626 are bound by 25th and 75th percentile with whiskers extending 1.5 IQR from the box. **(D)** Standardized  
627 heatmap for out-of-bag (OOB) predictions by a random forest trained to predict rootstock genotype, **(E)**  
628 the interaction between rootstock genotype by phenology, and **(F)** the interaction between rootstock  
629 genotype and leaf position.

630  
631 Figure 2: The metabolome is influenced by rootstock genotype, phenological stage, and time of sampling.  
632 **(A)** Percent variation captured in linear models fit to each of the top 20 principal components of the  
633 metabolome (661 measured metabolites). Presence of a cell indicates the model term (top) was significant  
634 for that PC (left, percent variation explained by the PC in parentheses). **(B)** The distribution of projections  
635 onto PC17, the strongest captured rootstock effect in the metabolome. Boxes are bound by the 25th and  
636 75th percentiles with whiskers extending 1.5 IQR from the box. **(C)** Projections of all samples into the  
637 first two dimensions of a linear discriminant space trained to maximize variation between rootstock  
638 genotypes.

639  
640 Figure 3: Gene expression primarily responds to time of season and circadian correlates  
641 **(A)** Heatmap showing 500 genes with the highest variance following the filtering of lowly expressed  
642 genes and gene-by-gene variance stabilizing transformations (VST) ordered by example model factors  
643 (below). **(B)** Percent variation captured in linear models fit to the top 100 Principal Components of the  
644 VST-transformed gene-expression space. Presence of a cell indicates the model term (top) was significant  
645 for that PC (left, percent variation explained by the PC in parentheses). **(C)** Projections of all samples into  
646 the first two principal component dimensions to show that the largest descriptors of variation are due to  
647 phenology. **(D)** Projections of all samples into the first two dimensions of the linear discriminant space  
648 trained to maximize variation between the rows of the vineyard, and **(E)** rootstock genotype.

649  
650 Figure 4: Leaf shape variation is primarily determined by shoot position but changes over the season



651 **(A)** Representative shapes showing leaf variation (-3 sd, mean, +3 sd) captured in each of the top 4  
652 principal components of the Generalized Procrustes Analysis-rotated leaf shapes. **(B)** Projections of all  
653 leaves into the first two dimensions of principal component space colored by the strongest determinant of  
654 variation in the top two PCs. **(C)** Projections of all leaves into the first two dimensions of a linear  
655 discriminant space trained to maximize variation between phenological stages. **(D)** Variation in leaf shape  
656 captured on PC2 shown by leaf position and phenological stage. Large points represent the mean of the  
657 group when projected onto PC2. Bars surrounding the mean show one standard deviation. Variation in  
658 each group is shown as a composite leaf trace scaled to a standard size and centered over the mean.

659

660 Figure 5: Vine physiology measurements show signal from most experimental manipulation

661 **(A)** Percent variation explained by model terms (top) from linear models fit to each of four physiology  
662 traits (left). **(B)** Variation in leaf transpiration rate for each rootstock genotype over the course of the  
663 season. Boxes are bound by the 25th and 75th percentiles with whiskers extending 1.5 IQR from the box.  
664 **(C)** Variation in stomatal conductance for each rootstock genotype over the course of the season. Boxes  
665 are bound by the 25th and 75th percentiles with whiskers extending 1.5 IQR from the box.

666

667 Figure 6: Trait covariation varies over the course of the season

668 Correlation networks showing patterns of covariation within and between phenotyping modalities. Nodes  
669 of the network are connected if they are significantly correlated (Pearson, FDR;  $p_{adj} < 0.05$ ). Edge  
670 thickness is proportional to the strength of correlation (multiplied by 16 for visibility). Edge color reflects  
671 the direction of the correlation where blue edges indicate positive correlations and orange edges indicate  
672 negative correlations. Modalities are indicated by a leading character and node color: ionomics (iPCs;  
673 purple), metabolomics (mPCs; pink), gene expression (gPCs; yellow), leaf shape (sPCs; green). Network  
674 topologies are shown for **(A)** anthesis, **(B)** veraison, and **(C)** harvest.

675

676 **Figure Supplement Legends:**

677 Supplemental Figure 1: Experimental Design

678 **(A)** Vineyard Map. The vineyard features a randomized block design where ‘Chambourcin’ is grown  
679 ungrafted and grafted to three rootstock genotypes: ‘1103P’, ‘3309C’, and ‘SO4’. Each row is treated  
680 with one of three irrigation treatments: full replacement of ET, reduced-deficit, no replacement of ET.  
681 Each cell of the vineyard contains four replicate grafts. **(B)** Phenotype sampling scheme across the four  
682 replicates in a cell. All vines (288) were sampled for ionomics and leaf shape. The middle two vines in  
683 the front half of the vineyard (72) were additionally sampled for metabolomics, gene expression, and  
684 physiology. **(C)** Phenotype sample scheme within a vine (along a shoot). For each plant, young leaves  
685 were sampled for ionomics, leaf shape, and gene expression. Middle leaves were sampled for ionomics,  
686 leaf shape, metabolomics, and physiology. Older leaves were sampled for ionomics and leaf shape.  
687 Samples for ionomics and leaf shape were taken from the same shoot. All other phenotypes were sampled  
688 from independent shoots. **(D)** Rootstock relatedness. Each of the rootstocks in this trial shares a parent  
689 species with a different rootstock. ‘1103P’ is a cross between *Vitis rupestris* and *V. berlandieri*. ‘3309C’  
690 is a cross between *V. rupestris* and *V. riparia*. ‘SO4’ is a cross between *V. riparia* and *V. berlandieri*. The  
691 parent that is shared between each pair of rootstocks is highlighted. This figure is partially reproduced  
692 from [19] available under a Creative Common license (CC BY 4.0).

693

694 Supplemental Figure 2: Patterns of ion covariation change over experimental treatments

695 Correlation networks showing patterns of ion covariation across phenological stages and shoot position.  
696 Nodes of the network are connected if they are significantly correlated (Pearson, FDR;  $p_{\text{adj}} < 0.05$ ).  
697 Edge thickness is proportional to the strength of correlation (multiplied by 16 for visibility). Edge color  
698 reflects the direction of the correlation where blue edges indicate positive correlations and orange edges  
699 indicate negative correlations.

700

701 Supplemental Figure 3: Patterns of variation contributing to gene expression linear discriminants

702 (A) Projections of leaf gene expression samples into the first two dimensions of a linear discriminant  
703 space trained to maximize variation between phenological stages, rows in the vineyard, and rootstock  
704 genotype. For each LD, the PCs that loaded significantly ( $>1.96$  sd from the mean loading) are listed in  
705 order of loading magnitude. (B) Distribution of the top loading PCs onto LD1 and LD2 for each of the  
706 trained models.

707

708 Supplemental Figure 4: Patterns of variation in leaf shape are subtle

709 (A) Percent variation captured in linear models fit to each of the top 20 principal components of leaf  
710 morphology. Presence of a cell indicates the model term (top) was significant for that PC (left, percent  
711 variation explained by the PC in parentheses). (B) Composite leaf traces for the main rootstock genotype  
712 effect identified on PC1.

713

714 Supplemental Figure 5: Example correlations within and between data modalities over the course of the  
715 season

716 (A) Example correlation showing a strong within-modality correlation between the ionomics gPC1 and  
717 gPC2 at anthesis. Pearson correlations by phenological stage and CIs derived from 10000 random 90%  
718 draws are shown for each panel. Generally speaking, CIs overlapping with 0 were not accepted as  
719 significant. (B) Example correlation showing one of the stronger between-modality correlations between  
720 the gene expression gPC4 and morphology (shape) sPC3 at veraison. (C) Example correlation of a  
721 relationship that is present multiple times over the course of the season between metabolomics mPC3 and  
722 gene expression gPC6 at both veraison and harvest. (D) Example correlation that is dynamic over the  
723 course of the growing season between the ionomics mPC3 and mPC6.

724

725 Supplemental Figure 6: Trait covariation varies over rootstock genotype

726 Correlation networks showing patterns of covariation within and between phenotyping modalities. Nodes  
727 of the network are connected if they are significantly correlated (Pearson, FDR;  $p_{\text{adj}} < 0.05$ ). Edge  
728 thickness is proportional to the strength of correlation (multiplied by 16 for visibility). Edge color reflects  
729 the direction of the correlation where blue edges indicate positive correlations and orange edges indicate  
730 negative correlations. Modalities are indicated by a leading character and node color: ionomics (iPCs;  
731 purple), metabolomics (mPCs; pink), gene expression (gPCs; yellow), leaf shape (sPCs; green). Network  
732 topologies are shown for (A) Ungrafted, (B) ‘1103P’-grafted vines, (C) ‘3309C’-grafted vines, and (D)  
733 ‘SO4’-grafted vines.

734

#### 735 **Availability of Data:**

736 Ionomics data are available at <https://dx.doi.org/10.6084/m9.figshare.13200980> . Metabolomics data are  
737 available at <https://dx.doi.org/10.6084/m9.figshare.13201043>. Gene expression data are available in the  
738 Sequence Read Archive under BioProject PRJNA674915. Leaf scans and leaf landmarks are available at  
739 <https://dx.doi.org/10.6084/m9.figshare.13200953>. Weather and physiology data are available at  
740 <https://dx.doi.org/10.6084/m9.figshare.13198682> and <https://dx.doi.org/10.6084/m9.figshare.13201016>,  
741 respectively.

742

#### 743 **Availability of Code:**

744 All code for this paper including shell scripts for RNAseq analysis and Jupyter Notebooks for data  
745 analysis in R can be found on the Vitis Underground GitHub  
746 ([https://github.com/PGRP1546869/mt\\_vernon\\_2017\\_leaf](https://github.com/PGRP1546869/mt_vernon_2017_leaf)).

747

#### 748 **Author Contributions:**

749 AJM, DHC, AF, LGK, MK, JPL, and QM designed the experiment. ZNH, LLK, MA, JFS, ZM, NB, EF,  
750 and JPL contributed to sample collection and sample processing. ZNH, LLK, JFS, and MA contributed to

751 data analysis. ZNH and AJM contributed to the writing of the manuscript. All authors contributed to  
752 manuscript editing.

753

754 **References:**

755 1. Gehan MA, Fahlgren N, Abbasi A, Berry JC, Callen ST, Chavez L, et al.. PlantCV v2: Image analysis  
756 software for high-throughput plant phenotyping. *PeerJ*. 2017; doi: 10.7717/peerj.4088.

757 2. Ubbens JR, Stavness I. Deep Plant Phenomics: A Deep Learning Platform for Complex Plant  
758 Phenotyping Tasks. *Front Plant Sci*. 2017; doi: 10.3389/fpls.2017.01190.

759 3. Ubbens J, Cieslak M, Prusinkiewicz P, Stavness I. Latent Space Phenotyping: Automatic Image-Based  
760 Phenotyping for Treatment Studies.

761 4. Soulé M. PHENETICS OF NATURAL POPULATIONS I. PHENETIC RELATIONSHIPS OF  
762 INSULAR POPULATIONS OF THE SIDE-BLOTCHED LIZARD. *Evolution*. 1967; doi:  
763 10.1111/j.1558-5646.1967.tb03413.x.

764 5. Houle D, Govindaraju DR, Omholt S. Phenomics: the next challenge. *Nat Rev Genet*. 2010; doi:  
765 10.1038/nrg2897.

766 6. Mudge K, Janick J, Scofield S, Goldschmidt EE. A History of Grafting. In: Janick J, editor.  
767 *Horticultural Reviews*. Hoboken, NJ, USA: John Wiley & Sons, Inc.;

768 7. Pouget R. Histoire de la lutte contre le phylloxéra de la vigne en France: 1868-1895. *Hist Sci Med*.  
769 INRA; 1990;

770 8. Walker MA, Lund K, Agüero C, Riaz S, Fort K, Heinitz C, et al.. BREEDING GRAPE  
771 ROOTSTOCKS FOR RESISTANCE TO PHYLLOXERA AND NEMATODES - IT'S NOT ALWAYS  
772 EASY. *Acta Horticulturae*.

- 773 9. Warschefsky EJ, Klein LL, Frank MH, Chitwood DH, Londo JP, von Wettberg EJB, et al.. Rootstocks:  
774 Diversity, Domestication, and Impacts on Shoot Phenotypes. *Trends Plant Sci.* Elsevier Current Trends;  
775 2016; doi: 10.1016/j.tplants.2015.11.008.
- 776 10. Tramontini S, Vitali M, Centioni L, Schubert A, Lovisolo C. Rootstock control of scion response to  
777 water stress in grapevine. *Environmental and Experimental Botany.*
- 778 11. Bavaresco L, Lovisolo C. Effect of grafting on grapevine chlorosis and hydraulic conductivity. *VITIS-*  
779 *Journal of Grapevine Research.* Citeseer; 2015;
- 780 12. Ferlito F, Distefano G, Gentile A, Allegra M, Lakso AN, Nicolosi E. Scion–rootstock interactions  
781 influence the growth and behaviour of the grapevine root system in a heavy clay soil. *Australian Journal*  
782 *of Grape and Wine Research.*
- 783 13. Ordish G. *The great wine blight.* J.M. Dent & Sons;
- 784 14. Cookson SJ, Ollat N. Grafting with rootstocks induces extensive transcriptional re-programming in  
785 the shoot apical meristem of grapevine. *BMC Plant Biol.* BioMed Central; 2013; doi: 10.1186/1471-2229-  
786 13-147.
- 787 15. Corso M, Vannozzi A, Ziliotto F, Zouine M, Maza E, Nicolato T, et al.. Grapevine Rootstocks  
788 Differentially Affect the Rate of Ripening and Modulate Auxin-Related Genes in Cabernet Sauvignon  
789 Berries. *Front Plant Sci.* Frontiers; 2016; doi: 10.3389/fpls.2016.00069.
- 790 16. Berdeja M, Nicolas P, Kappel C, Dai ZW, Hilbert G, Peccoux A, et al.. Water limitation and rootstock  
791 genotype interact to alter grape berry metabolism through transcriptome reprogramming. *Hortic Res.*  
792 2015; doi: 10.1038/hortres.2015.12.
- 793 17. Zombardo A, Crosatti C, Bagnaresi P, Bassolino L, Reshef N, Puccioni S, et al.. Transcriptomic and  
794 biochemical investigations support the role of rootstock-scion interaction in grapevine berry quality. *BMC*

- 795 *Genomics*. 2020; doi: 10.1186/s12864-020-06795-5.
- 796 18. Chitarra W, Perrone I, Avanzato CG, Minio A, Boccacci P, Santini D, et al.. Grapevine Grafting:  
797 Scion Transcript Profiling and Defense-Related Metabolites Induced by Rootstocks. *Front Plant Sci*.  
798 *Frontiers*; 2017; doi: 10.3389/fpls.2017.00654.
- 799 19. Migicovsky Z, Harris ZN, Klein LL, Li M, McDermaid A, Chitwood DH, et al.. Rootstock effects on  
800 scion phenotypes in a “Chambourcin” experimental vineyard. *Horticulture Research*. Nature Publishing  
801 Group; 2019; doi: 10.1038/s41438-019-0146-2.
- 802 20. Galet P. A Practical Ampelography: Grapevine Identification. Comstock Pub. Associates;
- 803 21. Mullins MG, Bouquet A, Williams LE. Biology of the Grapevine. Cambridge University Press;
- 804 22. Chitwood DH, Ranjan A, Martinez CC, Headland LR, Thiem T, Kumar R, et al.. A modern  
805 ampelography: a genetic basis for leaf shape and venation patterning in grape. *Plant Physiol*. 2014; doi:  
806 10.1104/pp.113.229708.
- 807 23. Chitwood DH, Klein LL, O’Hanlon R, Chacko S, Greg M, Kitchen C, et al.. Latent developmental  
808 and evolutionary shapes embedded within the grapevine leaf. *New Phytologist*.
- 809 24. Klein LL, Caito M, Chapnick C, Kitchen C, O’Hanlon R, Chitwood DH, et al.. Digital Morphometrics  
810 of Two North American Grapevines (*Vitis*: Vitaceae) Quantifies Leaf Variation between Species, within  
811 Species, and among Individuals. *Front Plant Sci*. 2017; doi: 10.3389/fpls.2017.00373.
- 812 25. Grimes DW, Williams LE. Irrigation Effects on Plant Water Relations and Productivity of Thompson  
813 Seedless Grapevines. *Crop Sci*. 1990; doi: 10.2135/cropsci1990.0011183X003000020003x.
- 814 26. Williams LE, Grimes DW. Modelling vine growth-development of a data set for a water balance  
815 subroutine. *Proceedings of the Sixth Australian Wine Industry Technical Conference*. p. 169–74.

- 816 27. Gautier A, Cookson SJ, Lagalle L, Ollat N, Marguerit E. Influence of the three main genetic  
817 backgrounds of grapevine rootstocks on petiolar nutrient concentrations of the scion, with a focus on  
818 phosphorus. *OENO One*. 2020; doi: 10.20870/oeno-one.2020.54.1.2458.
- 819 28. Lecourt J, Lauvergeat V, Ollat N, Vivin P, Cookson SJ. Shoot and root ionome responses to nitrate  
820 supply in grafted grapevines are rootstock genotype dependent: Rootstock and nitrogen supply affect  
821 grapevine ionome. *Aust J Grape Wine Res*. 2015; doi: 10.1111/ajgw.12136.
- 822 29. Salt DE, Baxter I, Lahner B. Ionomics and the study of the plant ionome. *Annu Rev Plant Biol*. 2008;  
823 doi: 10.1146/annurev.arplant.59.032607.092942.
- 824 30. Baxter I. Ionomics: The functional genomics of elements. *Brief Funct Genomics*. 2010; doi:  
825 10.1093/bfgp/elp055.
- 826 31. Ziegler G, Terauchi A, Becker A, Armstrong P, Hudson K, Baxter I. Ionic Screening of Field-  
827 Grown Soybean Identifies Mutants with Altered Seed Elemental Composition. *The Plant Genome*.
- 828 32. Oliver SG, Winson MK, Kell DB, Baganz F. Systematic functional analysis of the yeast genome.  
829 *Trends Biotechnol*. 1998; doi: 10.1016/s0167-7799(98)01214-1.
- 830 33. Tweeddale H, Notley-McRobb L, Ferenci T. Effect of slow growth on metabolism of *Escherichia coli*,  
831 as revealed by global metabolite pool (“metabolome”) analysis. *J Bacteriol*. 1998; doi:  
832 10.1128/JB.180.19.5109-5116.1998.
- 833 34. Islam MN, Downey F, Ng CKY. Comparative analysis of bioactive phytochemicals from *Scutellaria*  
834 *baicalensis*, *Scutellaria lateriflora*, *Scutellaria racemosa*, *Scutellaria tomentosa* and *Scutellaria wrightii* by  
835 LC-DAD-MS. *Metabolomics*. Springer; 7:446–532011;
- 836 35. Tautenhahn R, Patti GJ, Rinehart D, Siuzdak G. XCMS Online: a web-based platform to process  
837 untargeted metabolomic data. *Anal Chem*. 2012; doi: 10.1021/ac300698c.



- 838 36. Tandonnet S, Torres TT. Traditional versus 3' RNA-seq in a non-model species. *Genom Data*. 2017;  
839 doi: 10.1016/j.gdata.2016.11.002.
- 840 37. Bolger AM, Lohse M, Usadel B. Trimmomatic: a flexible trimmer for Illumina sequence data.  
841 *Bioinformatics*. 2014; doi: 10.1093/bioinformatics/btu170.
- 842 38. Bushnell B. BBTools software package. URL <http://sourceforge.net/projects/bbmap>. 2017;
- 843 39. Jaillon O, Aury J-M, Noel B, Policriti A, Clepet C, Casagrande A, et al.. The grapevine genome  
844 sequence suggests ancestral hexaploidization in major angiosperm phyla. *Nature*. 2007; doi:  
845 10.1038/nature06148.
- 846 40. Canaguier A, Grimplet J, Di Gaspero G, Scalabrin S, Duchêne E, Choisne N, et al.. A new version of  
847 the grapevine reference genome assembly (12X.v2) and of its annotation (VCost.v3). *Genom Data*. 2017;  
848 doi: 10.1016/j.gdata.2017.09.002.
- 849 41. Dobin A, Davis CA, Schlesinger F, Drenkow J, Zaleski C, Jha S, et al.. STAR: ultrafast universal  
850 RNA-seq aligner. *Bioinformatics*. 2013; doi: 10.1093/bioinformatics/bts635.
- 851 42. Anders S, Pyl PT, Huber W. HTSeq: Analysing high-throughput sequencing data with Python.
- 852 43. Love MI, Huber W, Anders S. Moderated estimation of fold change and dispersion for RNA-seq data  
853 with DESeq2. *Genome Biol*. 2014; doi: 10.1186/s13059-014-0550-8.
- 854 44. Anders S, Huber W. Differential expression analysis for sequence count data. *Genome Biol*. 2010;  
855 doi: 10.1186/gb-2010-11-10-r106.
- 856 45. Dryden IL, Mardia KV. Statistical Shape Analysis: With Applications in R. John Wiley & Sons;
- 857 46. Degu A, Hochberg U, Sikron N, Venturini L, Buson G, Ghan R, et al.. Metabolite and transcript  
858 profiling of berry skin during fruit development elucidates differential regulation between Cabernet

859 Sauvignon and Shiraz cultivars at branching points in the polyphenol pathway. *BMC Plant Biol.* 2014;  
860 doi: 10.1186/s12870-014-0188-4.

861 47. Anesi A, Stocchero M, Dal Santo S, Commisso M, Zenoni S, Ceoldo S, et al.. Towards a scientific  
862 interpretation of the terroir concept: plasticity of the grape berry metabolome. *BMC Plant Biol.* 2015; doi:  
863 10.1186/s12870-015-0584-4.

864 48. Cuadros-Inostroza A, Ruíz-Lara S, González E, Eckardt A, Willmitzer L, Peña-Cortés H. GC-MS  
865 metabolic profiling of Cabernet Sauvignon and Merlot cultivars during grapevine berry development and  
866 network analysis reveals a stage- and cultivar-dependent connectivity of primary metabolites.  
867 *Metabolomics.* 2016; doi: 10.1007/s11306-015-0927-z.

868 49. Dal Santo S, Fasoli M, Negri S, D'Inca E, Vicenzi N, Guzzo F, et al.. Plasticity of the Berry Ripening  
869 Program in a White Grape Variety. *Front Plant Sci.* 2016; doi: 10.3389/fpls.2016.00970.

870 50. Zamboni A, Di Carli M, Guzzo F, Stocchero M, Zenoni S, Ferrarini A, et al.. Identification of putative  
871 stage-specific grapevine berry biomarkers and omics data integration into networks. *Plant Physiol.* 2010;  
872 doi: 10.1104/pp.110.160275.

873 51. Dal Santo S, Tornielli GB, Zenoni S, Fasoli M, Farina L, Anesi A, et al.. The plasticity of the  
874 grapevine berry transcriptome. *Genome Biol.* 2013; doi: 10.1186/gb-2013-14-6-r54.

875 52. Chitwood DH, Rundell SM, Li DY, Woodford QL, Yu TT, Lopez JR, et al.. Climate and  
876 Developmental Plasticity: Interannual Variability in Grapevine Leaf Morphology. *Plant Physiol.* 2016;  
877 doi: 10.1104/pp.15.01825.

878 53. Chitwood DH, Mullins J, Migicovsky Z, Frank M, VanBuren R, Londo JP. Vein-to-blade ratio is an  
879 allometric indicator of climate-induced changes in grapevine leaf size and shape. bioRxiv.

880 54. Gautier A, Cookson SJ, Lagalle L, Ollat N, Marguerit E. Influence of the three main genetic

881 backgrounds of grapevine rootstocks on petiolar nutrient concentrations of the scion, with a focus on  
882 phosphorus. *OENO One*. 2020; doi: 10.20870/oeno-one.2020.54.1.2458.

883 55. Canas S, Assunção M, Brazão J, Zanol G, Eiras-Dias JE. Phenolic compounds involved in grafting  
884 incompatibility of *Vitis* spp: development and validation of an analytical method for their quantification.  
885 *Phytochem Anal*. 2015; doi: 10.1002/pca.2526.

886 56. Prodhomme D, Valls Fonayet J, Hévin C, Franc C, Hilbert G, de Revel G, et al.. Metabolite profiling  
887 during graft union formation reveals the reprogramming of primary metabolism and the induction of  
888 stilbene synthesis at the graft interface in grapevine. *BMC Plant Biol*. 2019; doi: 10.1186/s12870-019-  
889 2055-9.

890 57. Vitulo N, Forcato C, Carpinelli EC, Telatin A, Campagna D, D'Angelo M, et al.. A deep survey of  
891 alternative splicing in grape reveals changes in the splicing machinery related to tissue, stress condition  
892 and genotype. *BMC Plant Biol*. 2014; doi: 10.1186/1471-2229-14-99.

893 58. Harris ZN, Kovacs LG, Londo JP. RNA-seq-based genome annotation and identification of long-  
894 noncoding RNAs in the grapevine cultivar "Riesling." *BMC Genomics*. BioMed Central; 18:9372017;

895 59. Williams BR, Edwards CE, Kwasniewski MT, Miller AJ. Epigenomic patterns reflect irrigation and  
896 grafting in the grapevine clone 'Chambourcin'. *bioRxiv*. Cold Spring Harbor Laboratory; 2020;

897 60. Marasco R, Rolli E, Fusi M, Michoud G, Daffonchio D. Grapevine rootstocks shape underground  
898 bacterial microbiome and networking but not potential functionality. *Microbiome*. 2018; doi:  
899 10.1186/s40168-017-0391-2.

900 61. Swift JF, Hall ME, Harris ZN, Kwasniewski MT, Miller AJ. Grapevine microbiota reflect diversity  
901 among compartments and complex interactions within and among root and shoot systems. *bioRxiv*.

902 62. Palumbo MC, Zenoni S, Fasoli M, Massonnet M, Farina L, Castiglione F, et al.. Integrated network

903 analysis identifies fight-club nodes as a class of hubs encompassing key putative switch genes that induce  
904 major transcriptome reprogramming during grapevine development. *Plant Cell*. Am Soc Plant Biol;  
905 26:4617–352014;

906 63. Savoi S, Wong DCJ, Arapitsas P, Miculan M, Bucchetti B, Peterlunger E, et al.. Transcriptome and  
907 metabolite profiling reveals that prolonged drought modulates the phenylpropanoid and terpenoid  
908 pathway in white grapes (*Vitis vinifera* L.). *BMC Plant Biol*. 2016; doi: 10.1186/s12870-016-0760-1.

909 64. Savoi S, Wong DCJ, Degu A, Herrera JC, Bucchetti B, Peterlunger E, et al.. Multi-Omics and  
910 Integrated Network Analyses Reveal New Insights into the Systems Relationships between Metabolites,  
911 Structural Genes, and Transcriptional Regulators in Developing Grape Berries (*Vitis vinifera* L.) Exposed  
912 to Water Deficit. *Front Plant Sci*. 2017; doi: 10.3389/fpls.2017.01124.

913 65. Wong DCJ, Matus JT. Constructing Integrated Networks for Identifying New Secondary Metabolic  
914 Pathway Regulators in Grapevine: Recent Applications and Future Opportunities. *Front Plant Sci*. 2017;  
915 doi: 10.3389/fpls.2017.00505.

916 66. Fabres PJ, Collins C, Cavagnaro TR, Rodríguez López CM. A Concise Review on Multi-Omics Data  
917 Integration for Terroir Analysis in *Vitis vinifera*. *Front Plant Sci*. 2017; doi: 10.3389/fpls.2017.01065.

918 67. Huang S, Chaudhary K, Garmire LX. More Is Better: Recent Progress in Multi-Omics Data  
919 Integration Methods. *Front Genet*. 2017; doi: 10.3389/fgene.2017.00084.

920 68. Stein-O'Brien GL, Arora R, Culhane AC, Favorov AV, Garmire LX, Greene CS, et al.. Enter the  
921 Matrix: Factorization Uncovers Knowledge from Omics. *Trends Genet*. 2018; doi:  
922 10.1016/j.tig.2018.07.003.

923 69. Fox J, Friendly M, Weisberg S. Hypothesis tests for multivariate linear models using the car package.  
924 *R J*. Citeseer; 5:39–522013;

- 925 70. R Core Team. R: A language and environment for statistical computing. Vienna, Austria;
- 926 71. Lenth R, Singmann H, Love J, Others. Emmeans: Estimated marginal means, aka least-squares  
927 means. *R package version*. 12018;
- 928 72. Ripley BD. Modern applied statistics with S. Springer;
- 929 73. Wickham H. ggplot2: Elegant Graphics for Data Analysis. Springer;
- 930 74. Liaw A, Wiener M, Others. Classification and regression by randomForest. *R news*. 2:18–222002;
- 931 75. Kuhn M. Predictive Modeling with R and the caret Package. *Google Scholar*. 2013;
- 932 76. Team RC, Others. R foundation for statistical computing. *Vienna, Austria*. 32013;
- 933 77. Csardi G, Nepusz T, Others. The igraph software package for complex network research.  
934 *InterJournal, complex systems*. 1695:1–92006;
- 935

**Figure 1**

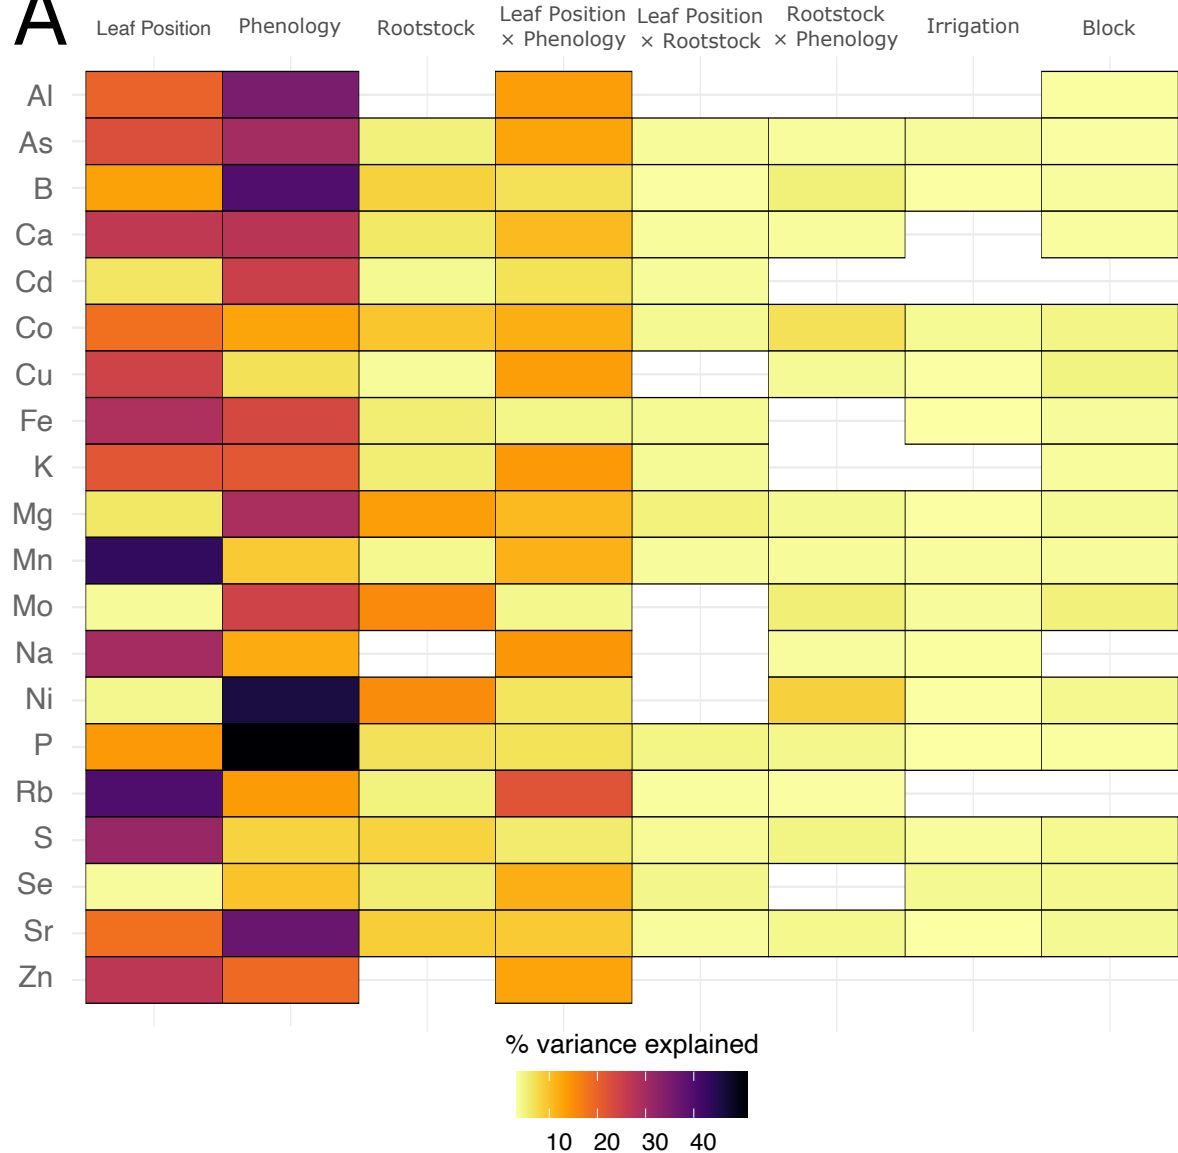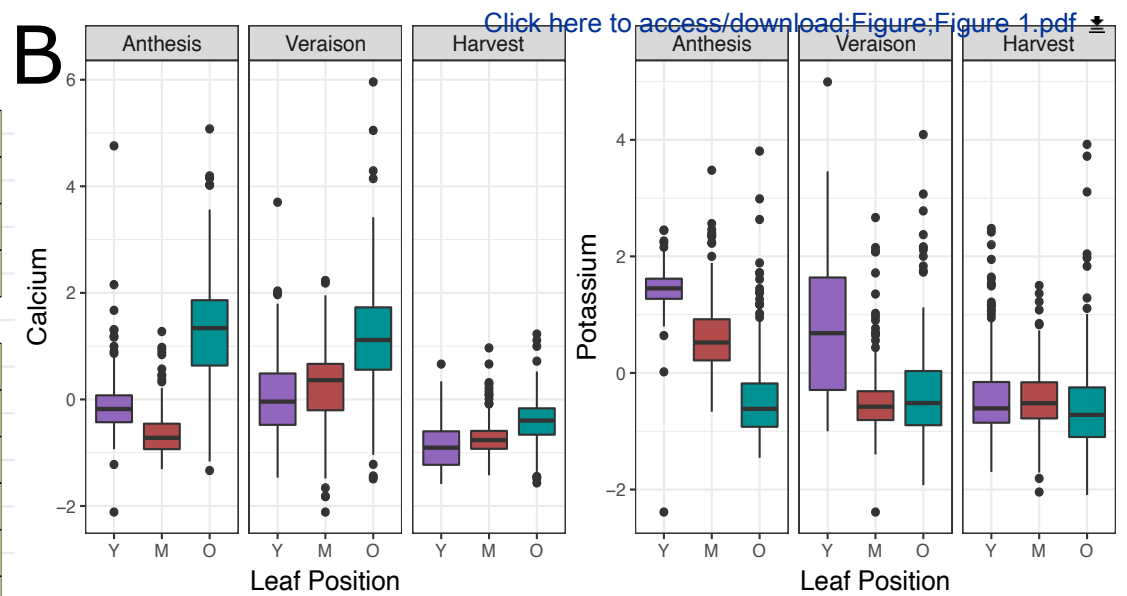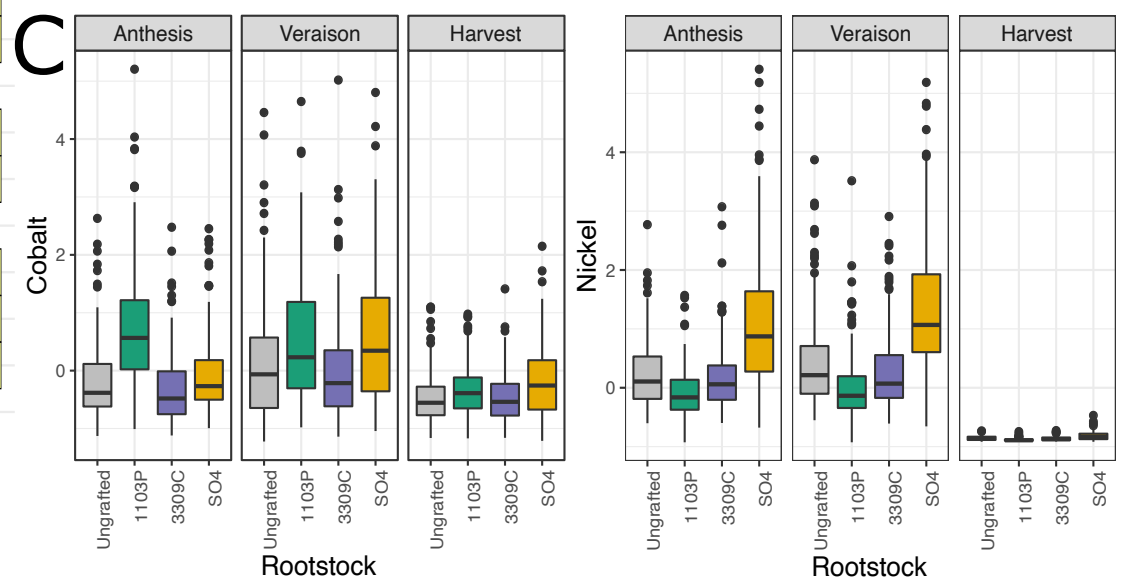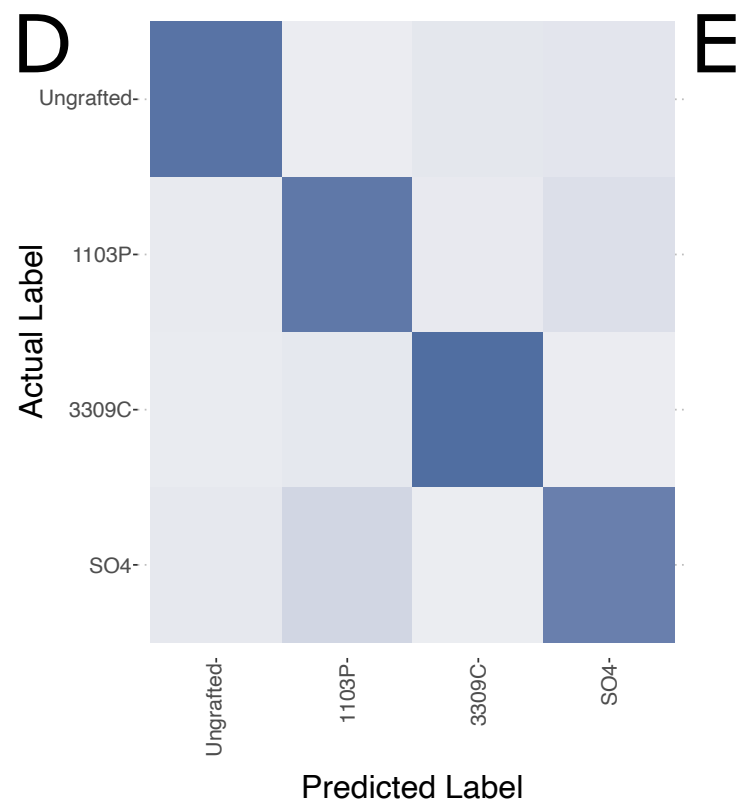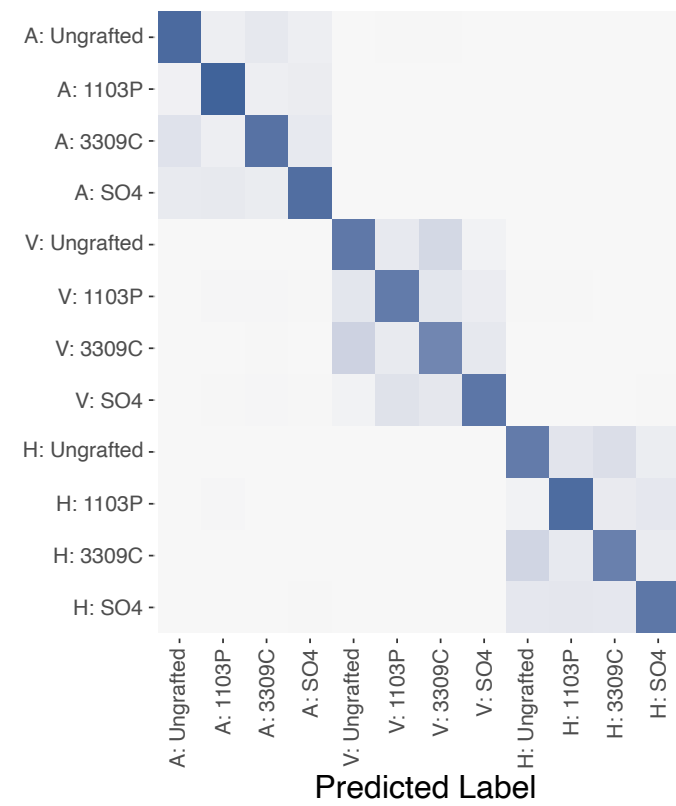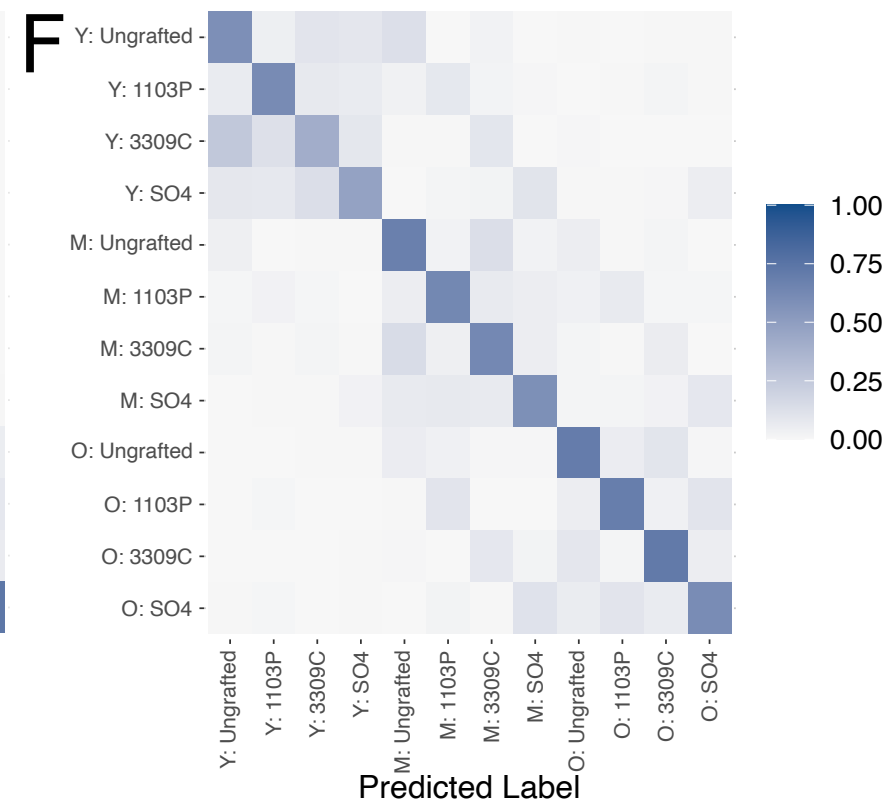

[Click here to access/download:Figure,Figure 1.pdf](#)

Figure 2

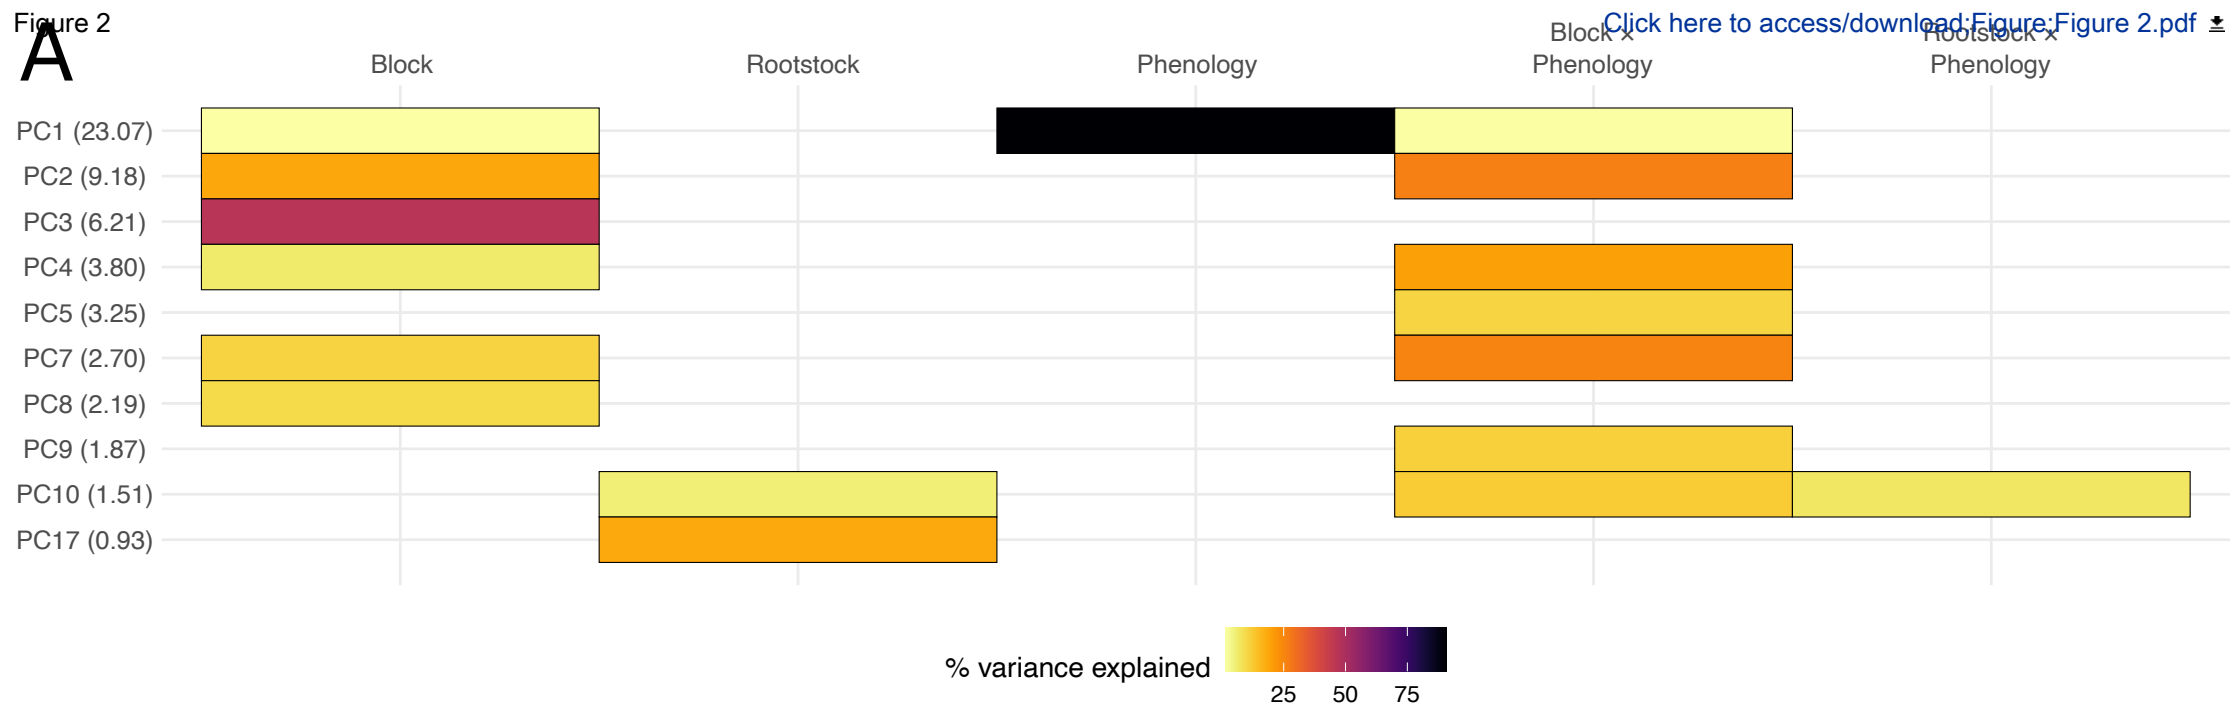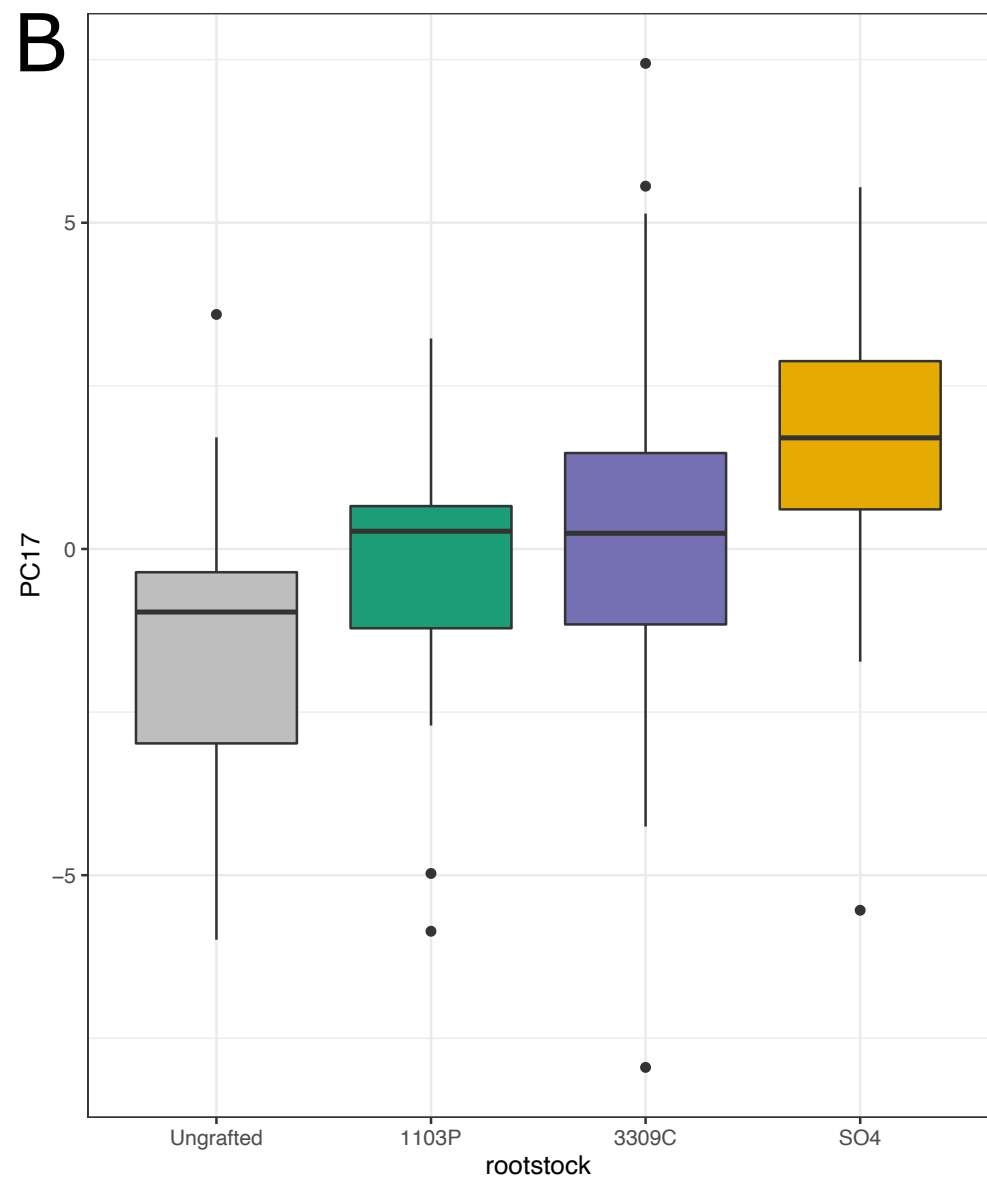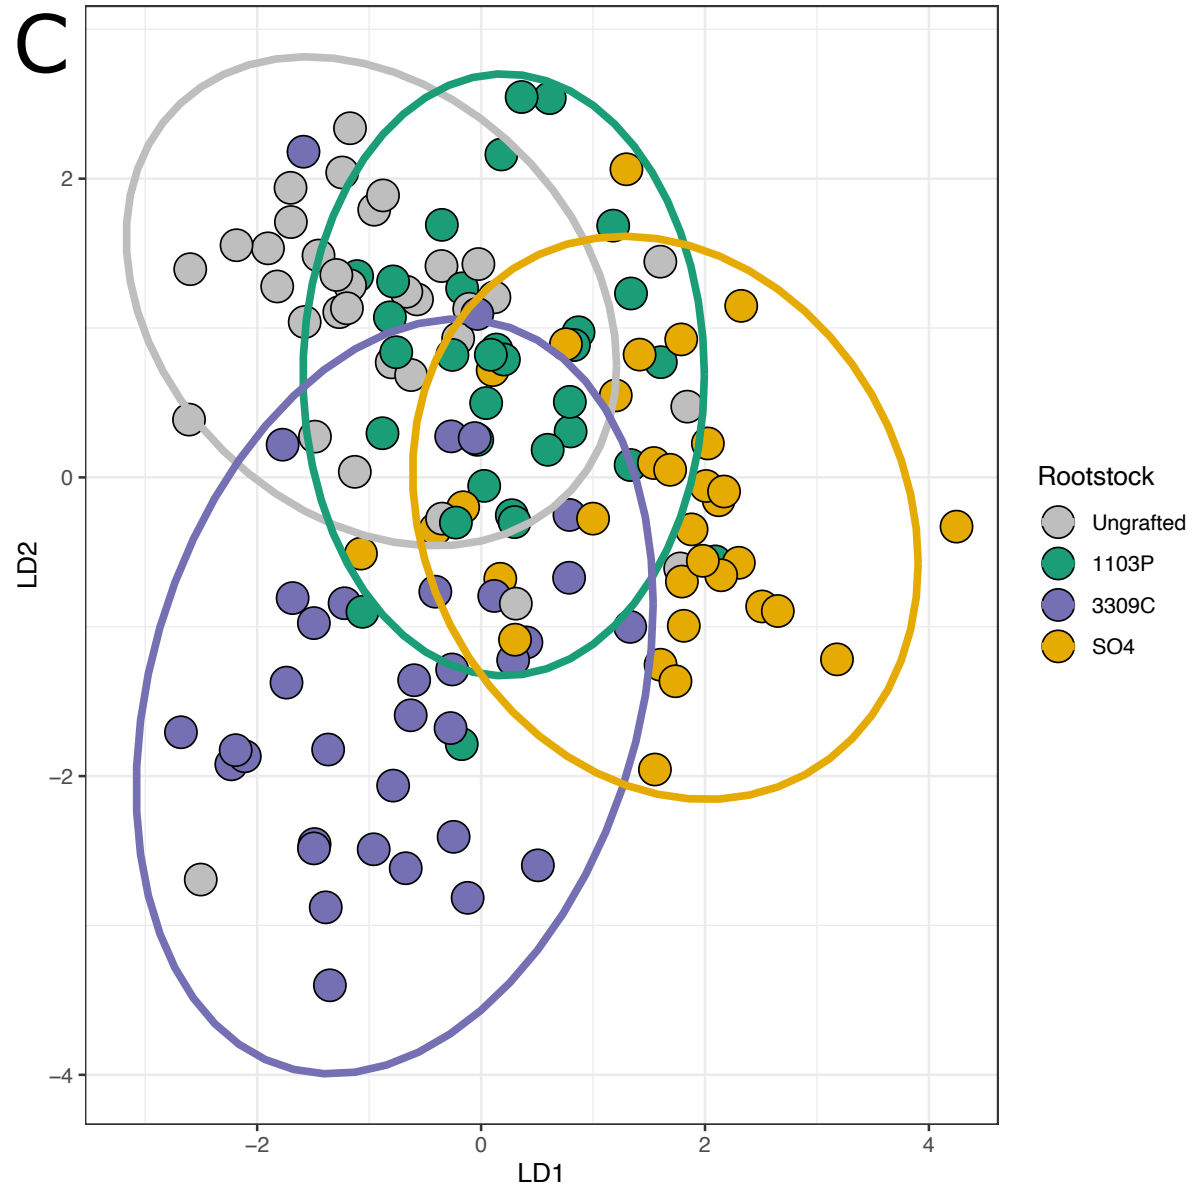

Figure 3

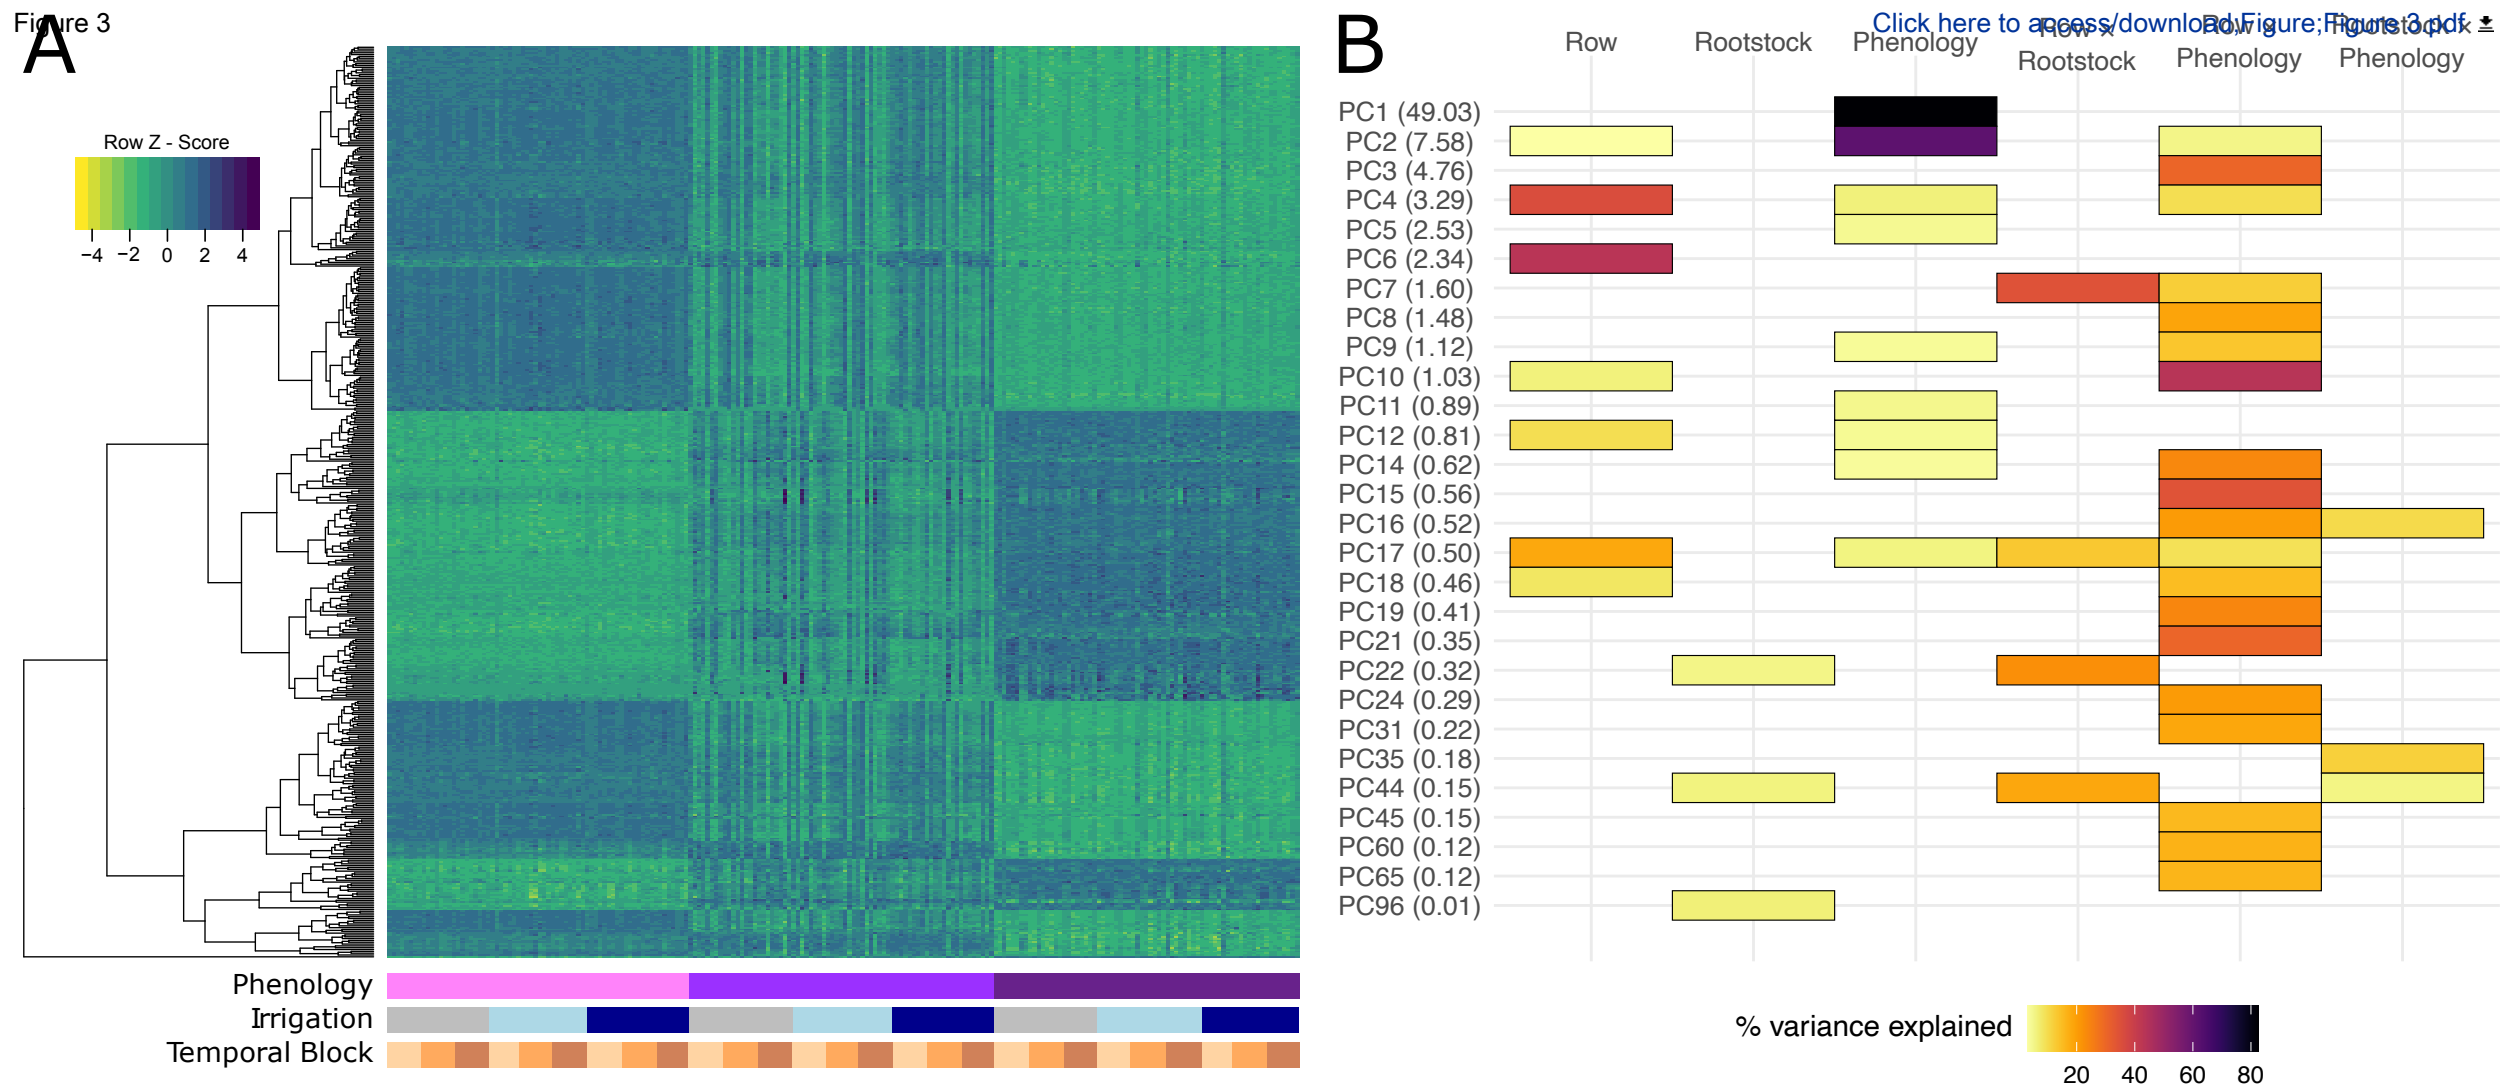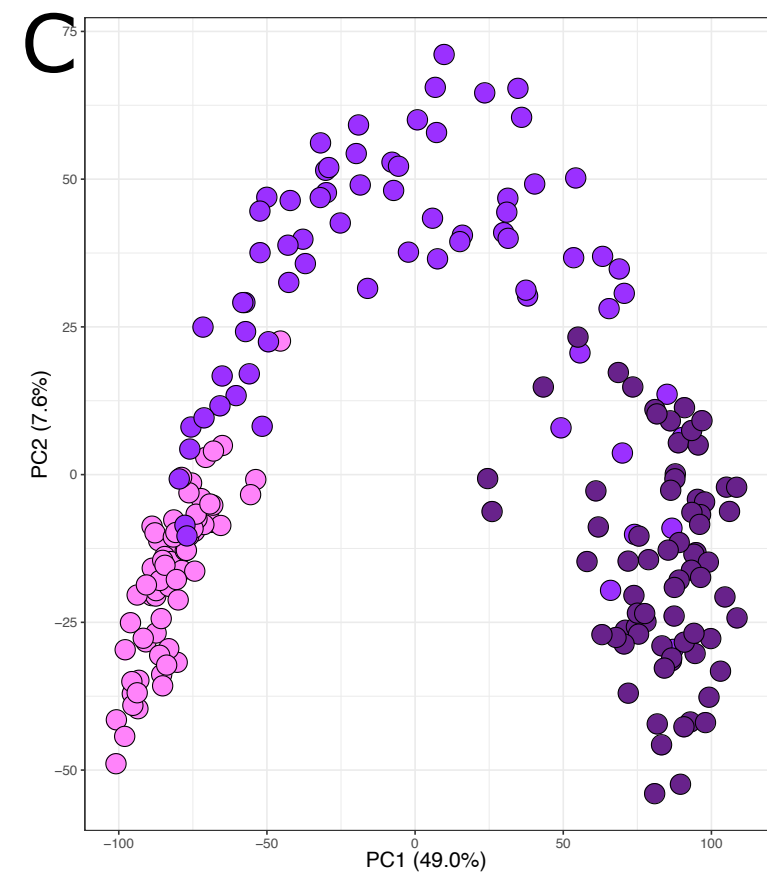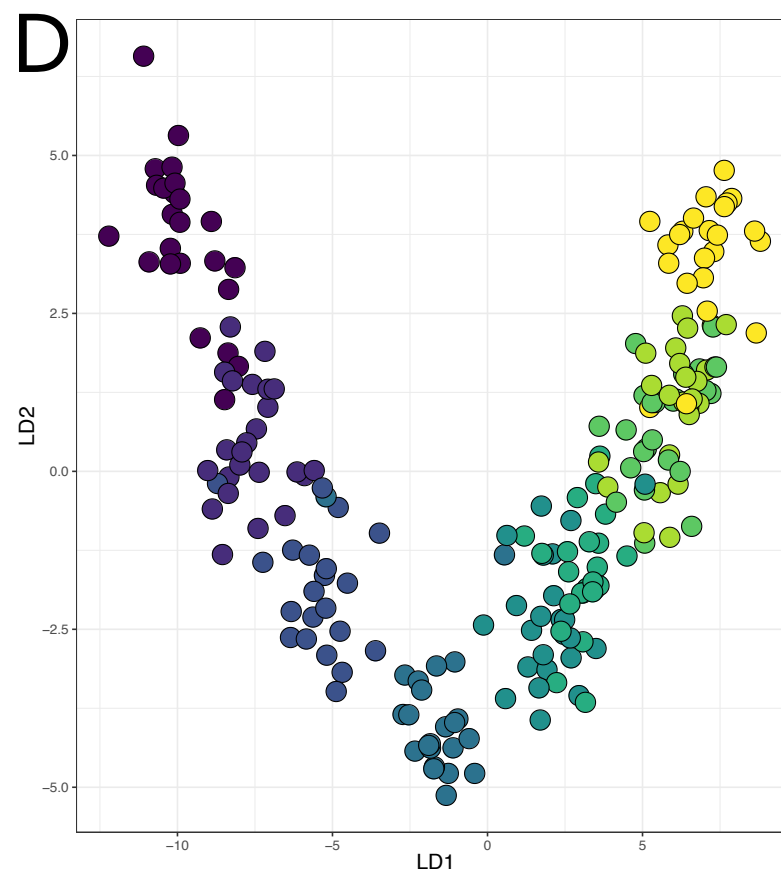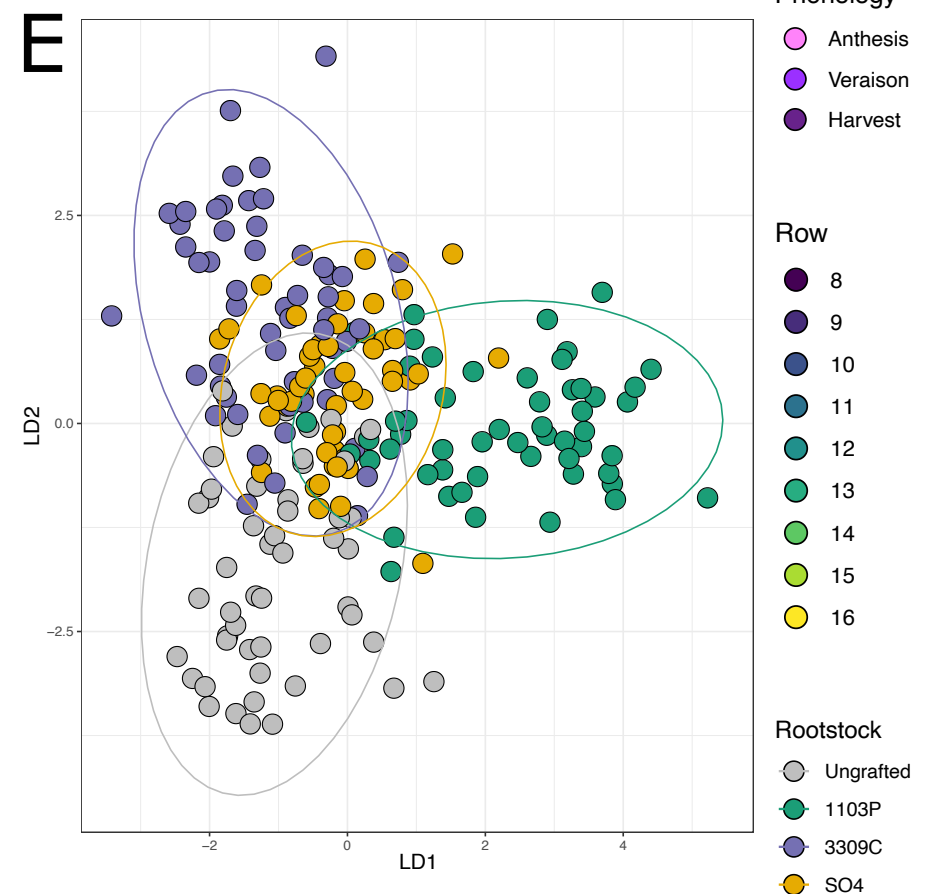



Figure 4

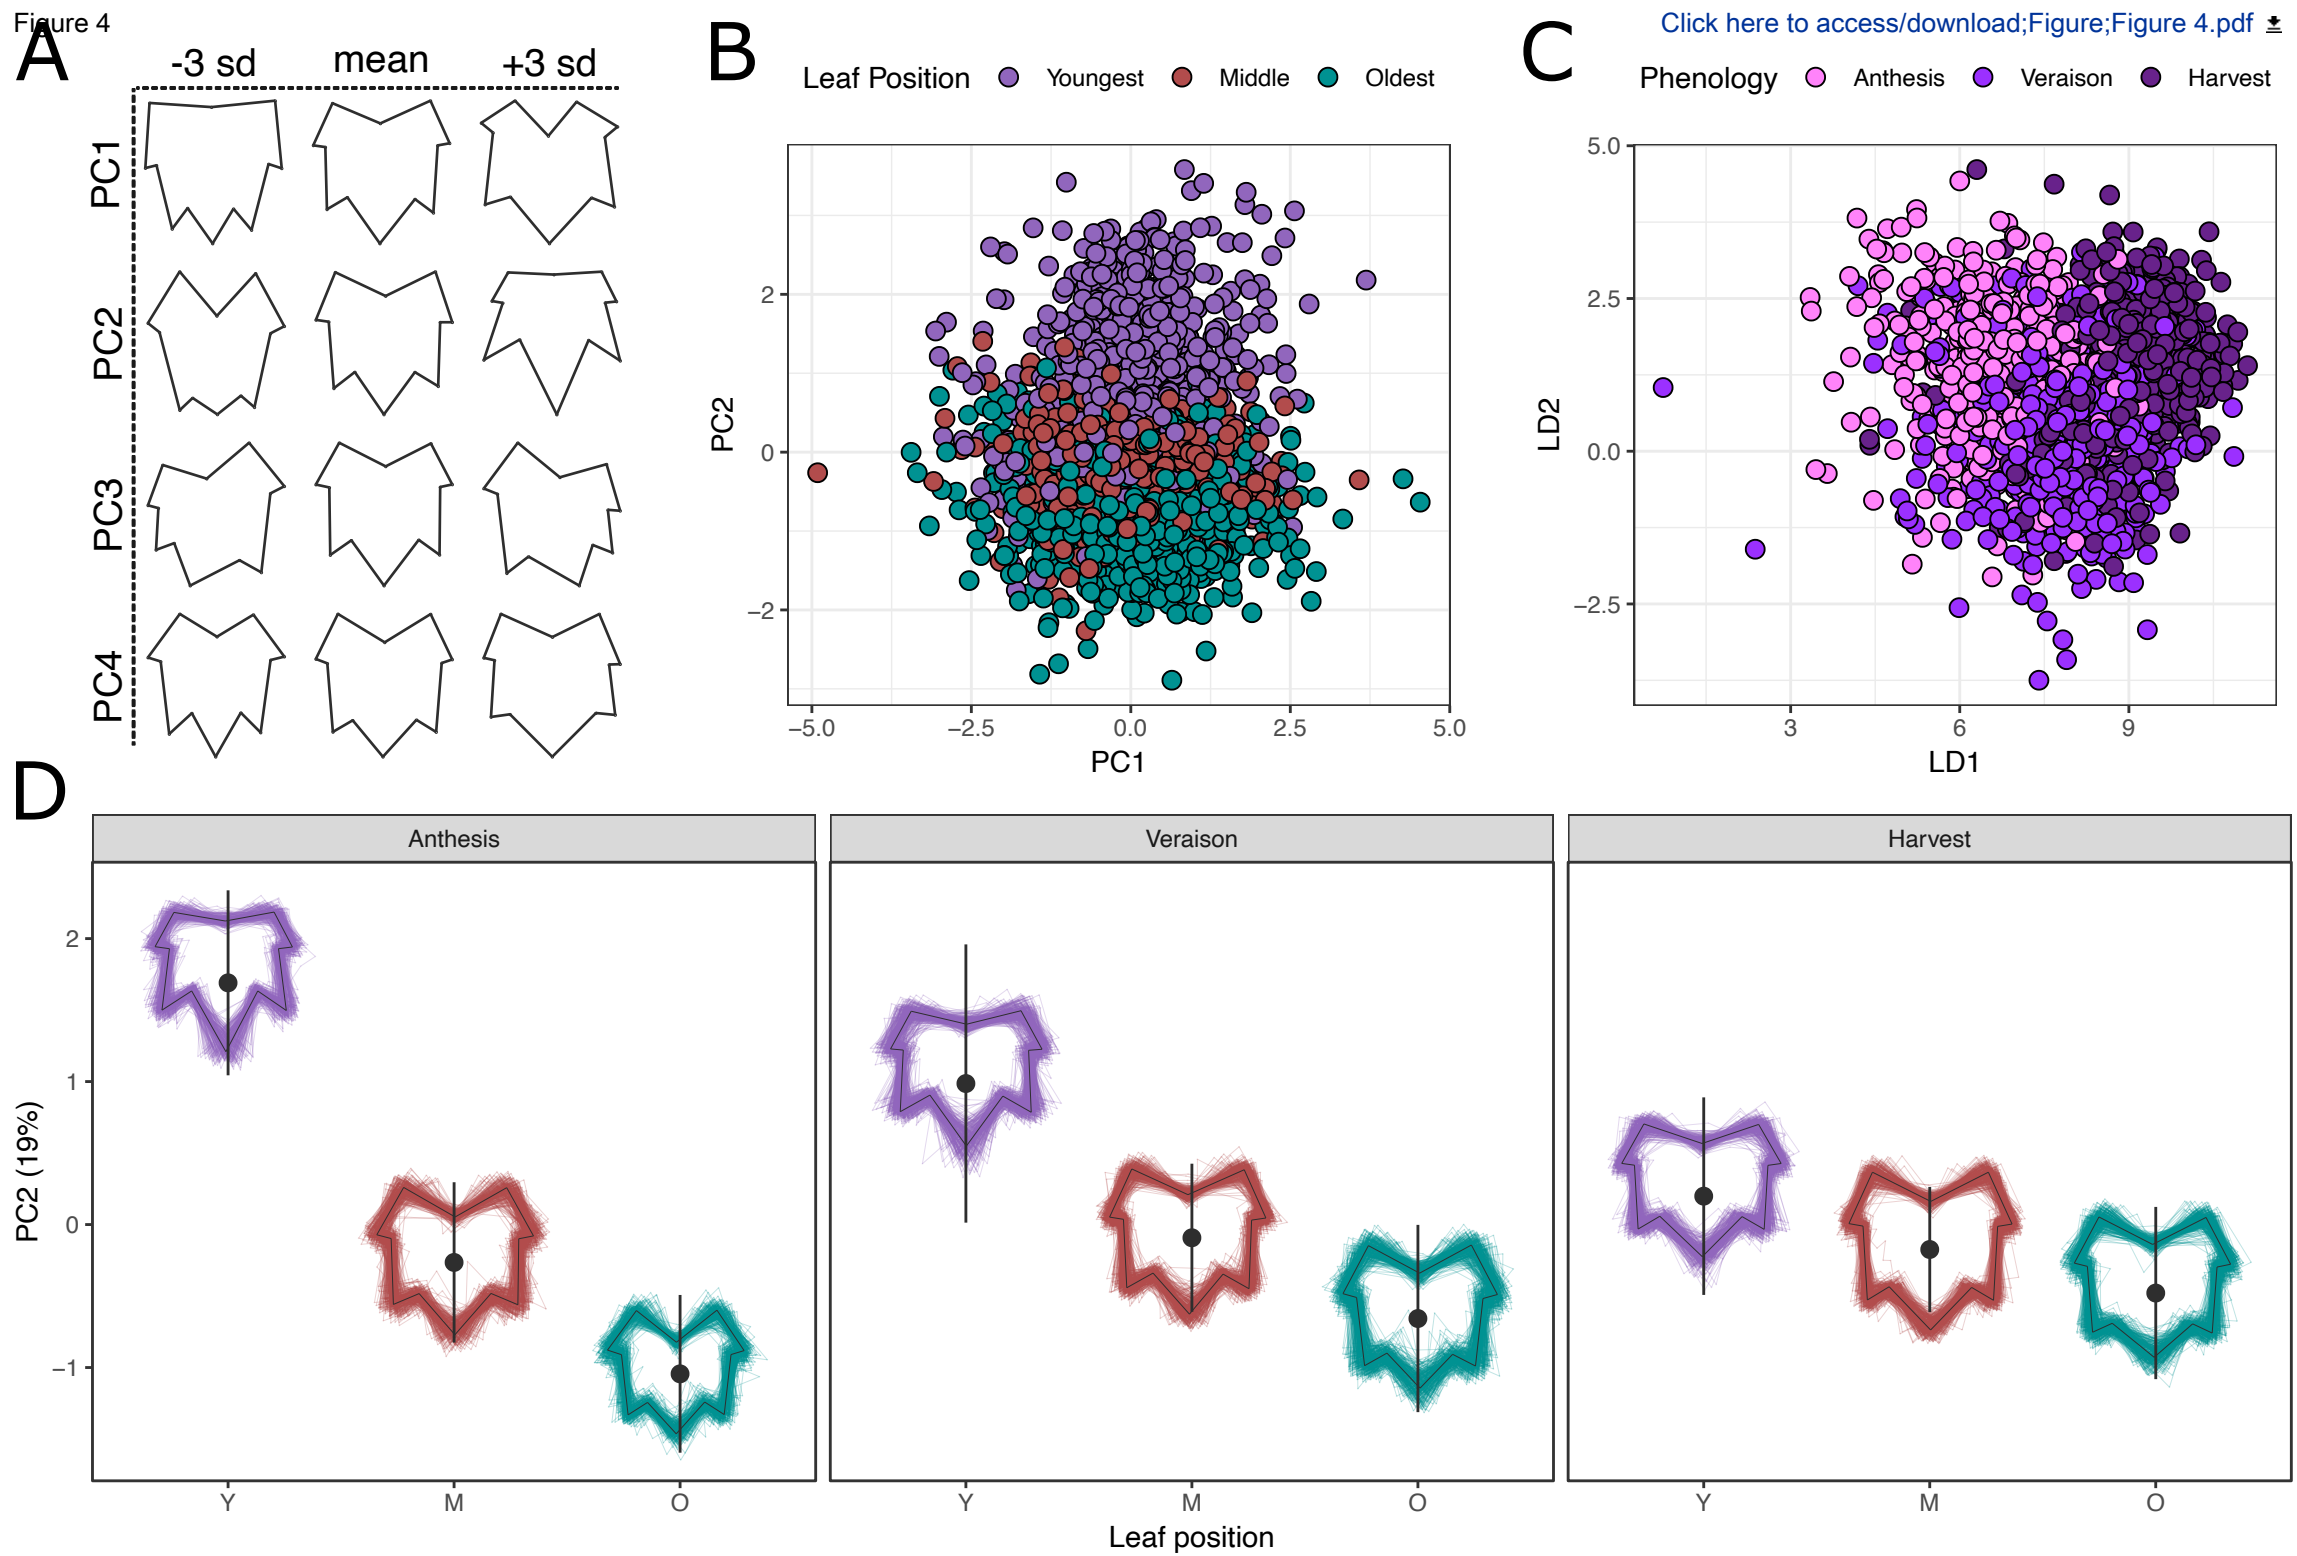

[Click here to access/download;Figure;Figure 4.pdf](#)

**A**

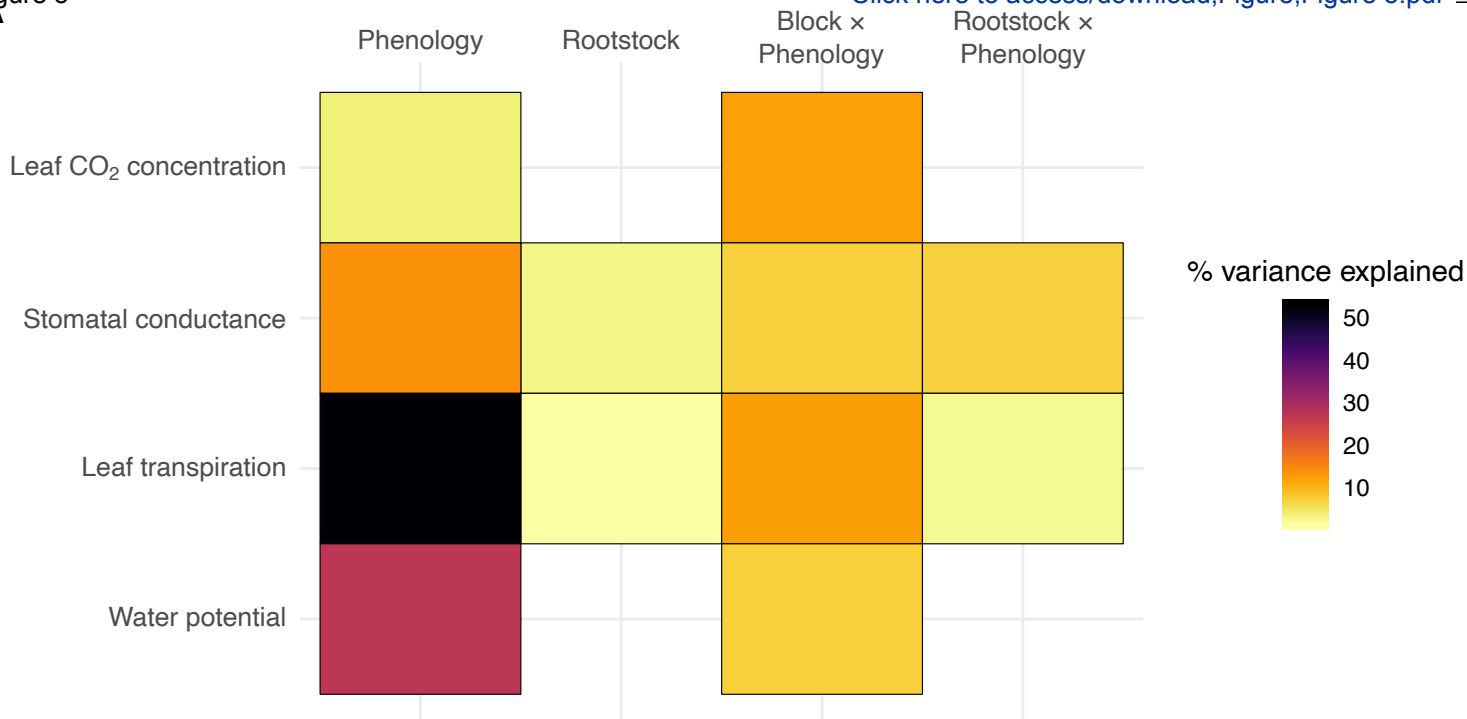

**B**

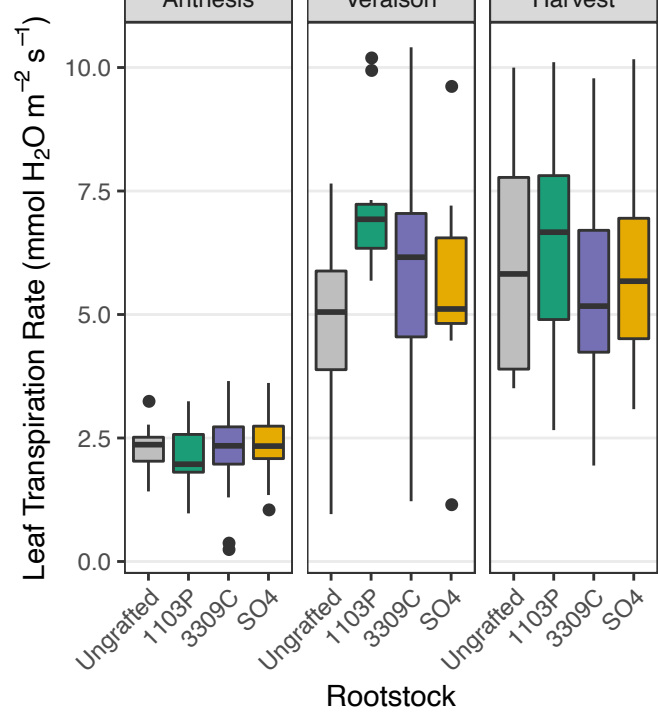

**C**

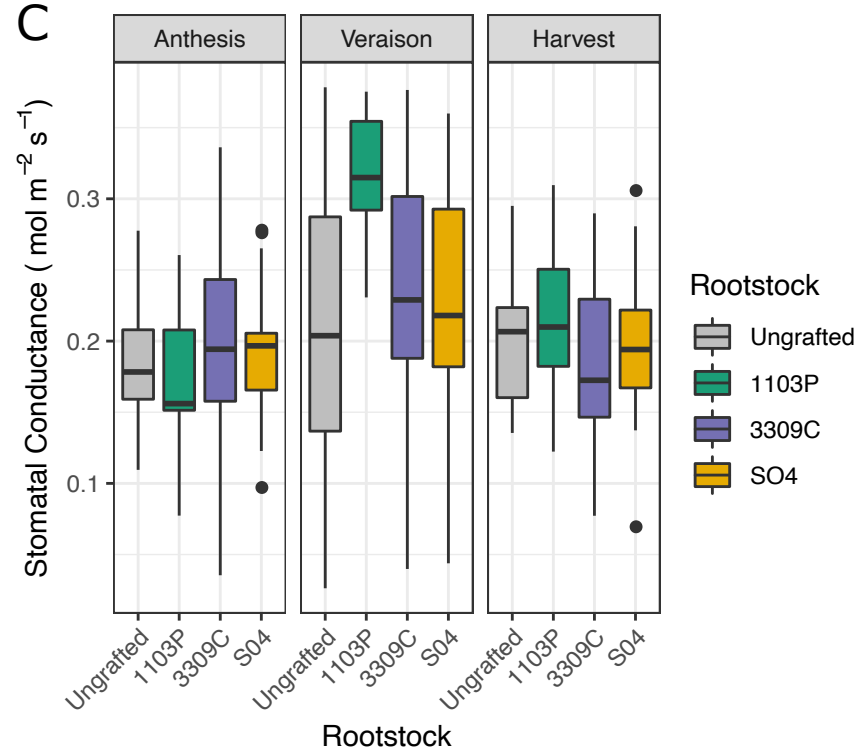

Figure 6

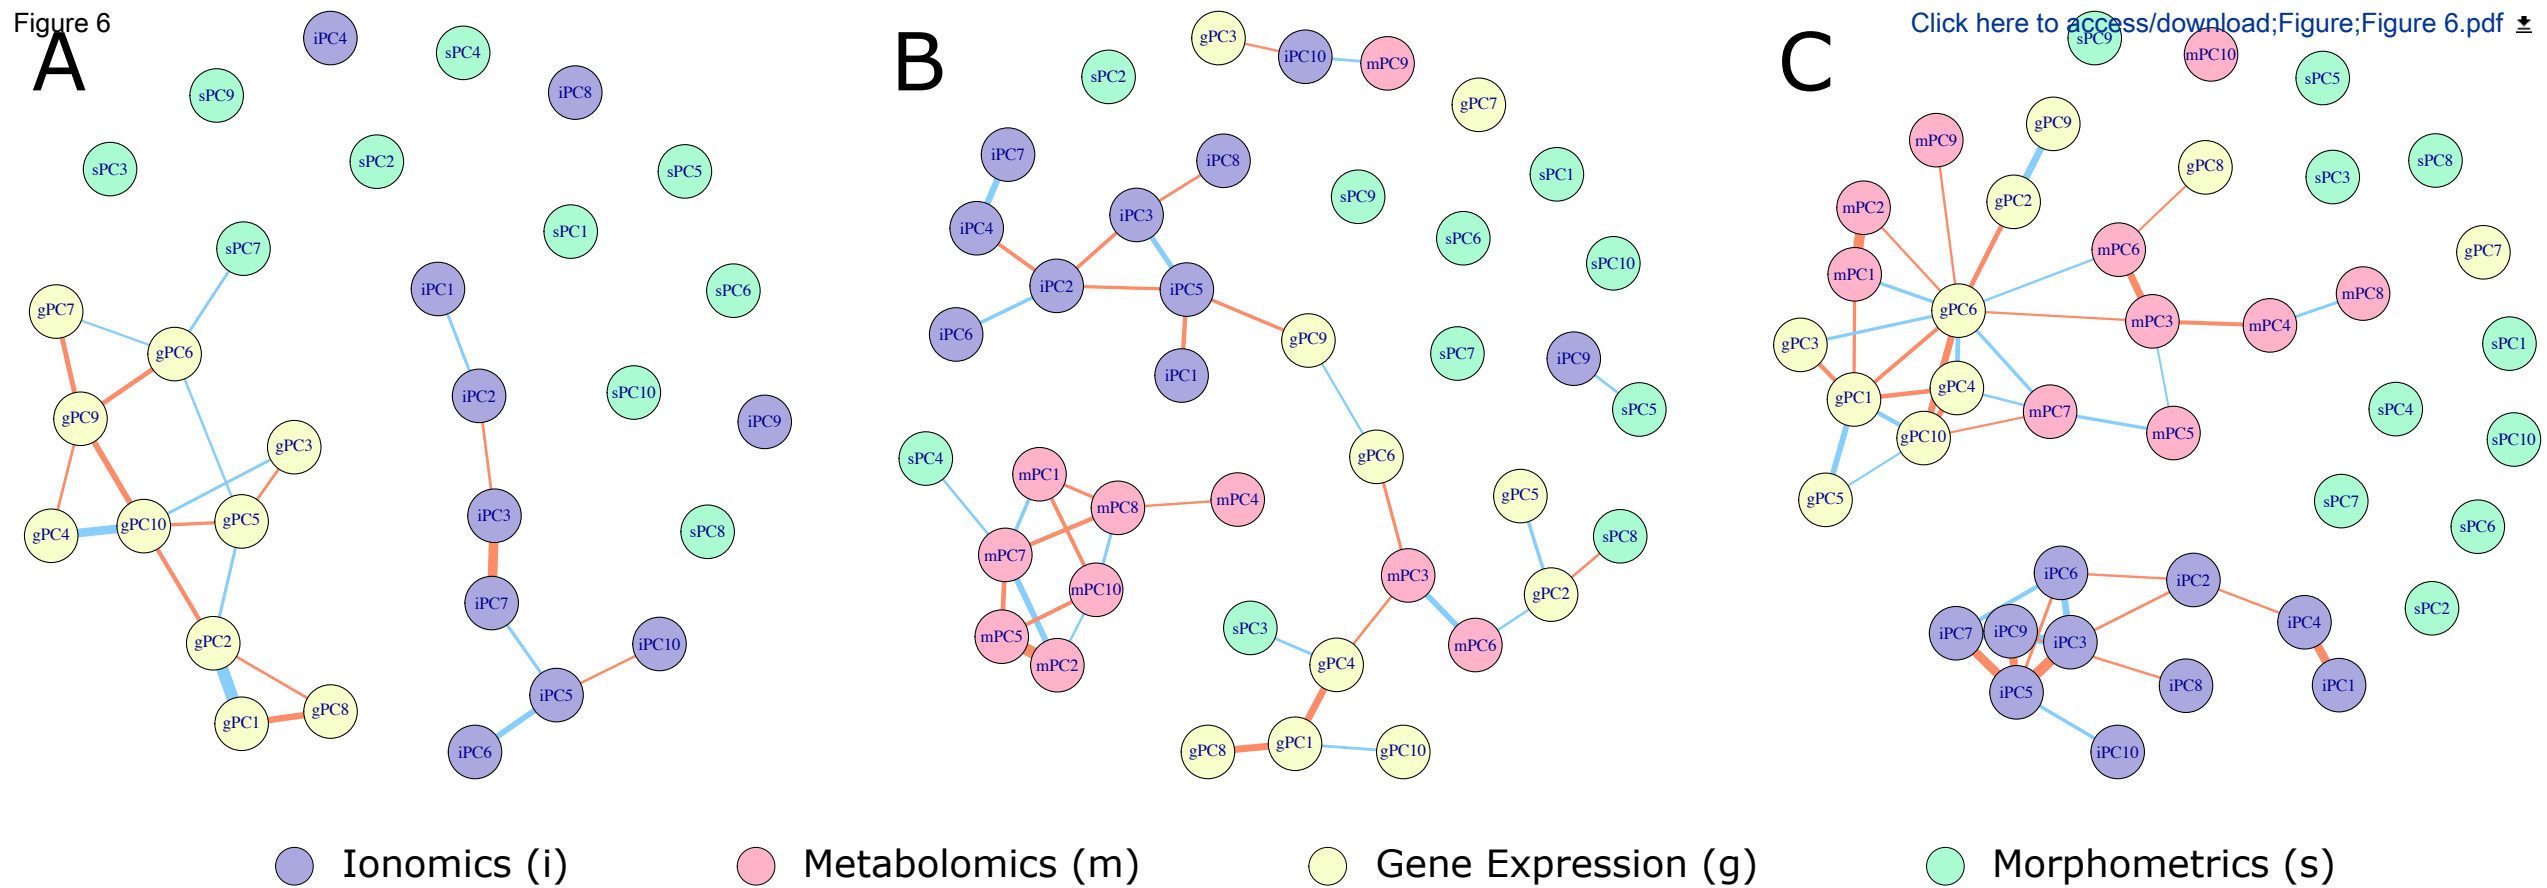

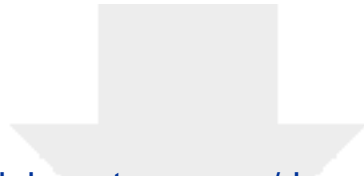

Click here to access/download  
**Supplementary Material**  
Supplemental Figure 1.pdf

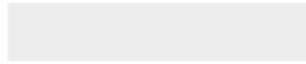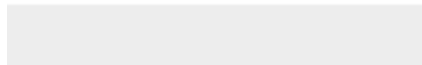



Click here to access/download  
**Supplementary Material**  
Supplemental Figure 2.pdf

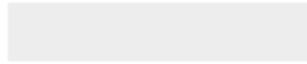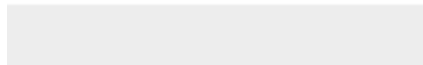



Click here to access/download  
**Supplementary Material**  
Supplemental Figure 3.pdf





Click here to access/download  
**Supplementary Material**  
Supplemental Figure 4.pdf

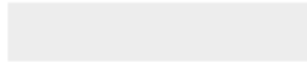



Click here to access/download  
**Supplementary Material**  
Supplemental Figure 5.pdf







Click here to access/download  
**Supplementary Material**  
Supplemental Figure 6.pdf



Dear Editorial Board,

We are excited to submit our manuscript entitled “Multi-dimensional leaf phenotypes reflect root system genotype in grafted grapevine over the growing season” to be considered for peer review at *GigaScience*. Our manuscript describes advances in the fundamental question of how phenotypic variation changes over time in perennial plants, focusing primarily on the influence of below-ground organs on above-ground phenotypes using multi-dimensional phenomic platforms. We believe our manuscript matches the journal’s focus on using big data in the life sciences and to ensure reproducibility through extensive data and analytical transparency; further, our work fits nicely within the thematic series on Plant Phenomics. We note that our work has been uploaded as a preprint on BioRxiv:

<https://www.biorxiv.org/content/10.1101/2020.11.10.376947v1.abstract>

In plants, understanding how the root system affects above-ground structures of the shoot system is a fundamental question in plant biology. Grafting offers a powerful experimental approach where clonally propagated genotypes are fused to form grafted individuals with genetically distinct root and shoot systems. Populations generated via grafting can include replicated individuals with genetically identical shoot systems but genetically distinct root systems. This allows for quantification of phenotypic variation expressed in the shoot system as a function of root system genotype. Our study quantifies root system influence on shoot system phenotypes in grafted grapevines through comprehensive phenotyping of leaves, the primary site of photosynthesis and important markers of cultivar identification. In an experimental grafted vineyard in southwestern Missouri, we surveyed five multi-dimensional phenotyping modalities in leaves at three time points in the season: ionomics, metabolomics, transcriptomics, morphometrics (shape), and physiology. These data were used to address the broad questions: to what extent do root system genotypes influence leaf phenotypes, and how does this change over the course of a season?

To our knowledge, this work is the largest study of its kind both in the size of the population (a ten-year old experimental vineyard with four root-shoot combinations replicated 72 times in a randomized block design of 288 vines) and the depth to which we surveyed leaf phenotypes (five multi-dimensional phenotyping modalities at three time points throughout a season). This robust study design in addition to the application of multi-dimensional phenotyping platforms allowed us to identify the complex nature by which root systems can influence shoot system phenotypes.

Work presented here demonstrates that the root system exercises subtle but ubiquitous influence on leaves for every phenotypic modality examined. Moreover, our work highlights the dynamic nature of root-shoot interactions: root system influence on leaf phenotypes changes over the course of a season, with the most dramatic effects observed during early season growth, but with distinct patterns observed across modalities. In addition, we show that covariation among multi-dimensional leaf phenotypes is highly dynamic across the rootstock genotype and time of season.

We appreciate your time and consideration of our manuscript. We look forward to hearing from you.

Best regards,

Zachary N. Harris & Allison J. Miller
